# Supplementary material for: NaI/TBHP-promoted reaction of indole-2-thiones with arylsulfonyl hydrazides: construction of achiral axial 3,3′-biindole-2,2′-dibenzenesulfonothioate derivatives
Source: Royal Society of Chemistry journal article supplement (doi:10.1039/d1qo00972a), 2021-01-01

# Supporting Information

## **NaI/TBHP-Promoted Reaction of Indole-2-thiones with Arylsulfonyl**

### **Hydrazides: Construction of Achiral Axial**

### **3,3'-Biindole-2,2'-dibenzenesulfonylthioate Derivatives**

Lin Xu,<sup>a</sup> Pei Xu,<sup>a</sup> Yi-Ming Zhu,<sup>a</sup> Wei-Dong Rao,<sup>b</sup> Shun-Yi Wang<sup>a,\*</sup>

<sup>a</sup>Key Laboratory of Organic Synthesis of Jiangsu Province, College of Chemistry, Chemical Engineering and Materials Science & Collaborative Innovation Center of Suzhou Nano Science and Technology, Soochow University, Suzhou 215123, China

<sup>b</sup>Key Laboratory of Biomass-based Green Fuels and Chemicals, College of Chemical Engineering, Nanjing Forestry University, Nanjing 210037, China

## **Contents**

|                                                                           |            |
|---------------------------------------------------------------------------|------------|
| <b>1. General Information.....</b>                                        | <b>S2</b>  |
| <b>2. Experimental Section.....</b>                                       | <b>S3</b>  |
| <b>2.1. Preparation of Starting Materials.....</b>                        | <b>S3</b>  |
| <b>2.2. General Procedure for the Synthesis of Products.....</b>          | <b>S3</b>  |
| <b>2.3 Spectra Information of Starting Materials and Products.....</b>    | <b>S3</b>  |
| <b>2.4 References.....</b>                                                | <b>S9</b>  |
| <b>3. X-Ray Crystallographic Data for 3aa.....</b>                        | <b>S10</b> |
| <b>4. EPR Studies of Interaction.....</b>                                 | <b>S11</b> |
| <b>5. Copies of <sup>1</sup>H NMR and <sup>13</sup>C NMR Spectra.....</b> | <b>S12</b> |

## 1. General Information

All commercially available compounds were used without further purification, unless otherwise noted. Solvents for chromatography were analytical grade and used without further purification. Analytical thin-layer chromatography (TLC) was performed on silica gel, visualized by irradiation with UV light. 200-300 mesh silica gel was used for column chromatography.  $^1\text{H}$  and  $^{13}\text{C}$  NMR spectra were recorded on BRUKER 400 MHz spectrometer in  $\text{CDCl}_3$ . Chemical shifts ( $\delta$ ) were reported according to an internal tetramethylsilane (TMS) standard or the  $\text{CDCl}_3$  residual peak ( $\delta$  7.26) for  $^1\text{H}$  NMR. Chemical shifts of  $^{13}\text{C}$  NMR were reported relative to  $\text{CDCl}_3$  ( $\delta$  77.16). Data were reported in the following order: chemical shift ( $\delta$ ) in ppm; multiplicities are indicated s (singlet), bs (broad singlet), d (doublet), t (triplet), q (quartet), m (multiplet); coupling constants (J) are in Hertz (Hz). IR spectra were recorded on a BRUKER VERTEX 70 spectrophotometer and are reported in terms of frequency of absorption ( $\text{cm}^{-1}$ ). HRMS spectra were obtained by using BRUKER micrOTOF-Q III instrument with ESI source.

## 2. Experimental Section

### 2.1. Preparation of Starting Materials

Take **3a** as example, indole-2-thione (**1a**) were synthesized according to the published methods with minor modifications.<sup>1</sup>

**Procedure 1:** To a suspension of NaH (0.56 g, 23.3 mmol) in toluene (20 mL) was added 2-oxindole (1.71 g, 10.0 mmol), the resulting mixture was heated at 60 °C oil bath for 30 min. After that, Me<sub>2</sub>SO<sub>4</sub> (1.2 mL, 12.0 mmol) was added. After 4 hours, the reaction was quenched with saturated NH<sub>4</sub>Cl solution and extracted with ethyl acetate (3×20 mL). The combined organic layers were dried over Na<sub>2</sub>SO<sub>4</sub>, filtered, concentrated and purified on silica gel chromatography.

**Procedure 2:** A suspension of P<sub>2</sub>S<sub>5</sub> (1.0 g, 2.3 mmol) in THF (25 mL) was allowed to stir for 10 min at room temperature, and then the product of last step was added. The reaction mixture was allowed to stir for 4 hours at room temperature. The reaction mixture was filtered (gravity) and the excess of THF was removed under reduced pressure. Ice-cold water (50 mL) was added to the residue with vigorous stirring to afford a light yellow precipitate that was filtered and air-dried. Sulfonylhydrazide were synthesized according to the published methods with minor modifications.<sup>2</sup>

### 2.2. General Procedure for the Synthesis of Products

Take **3a** as example, to a acetonitrile (2 mL) solution of indole-2-thione **1a** (0.2 mmol), sulfonylhydrazide **2a** (0.3 mmol) and NaI (40 mol %) in an oven-dried reactor tube equipped a stir bar was added *tert*-butyl hydroperoxide (70% in aqueous solution, 2.5 equiv.). The reaction mixture was stirred at room temperature for 12 h. The reaction mixture was filtered (gravity) and the solvent was evaporated off and the residue was purified by flash column chromatography (silica gel, petroleum ether/EtOAc = 10:1) to afford Product **3a**.

### 2.3. Spectra Information of Starting Materials and Products

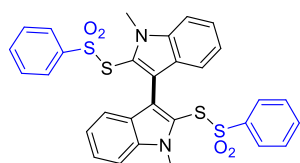

***S,S'*-(1,1'-dimethyl-1H,1'H-[3,3'-biindole]-2,2'-diyl) dibenzenesulfonylthioate (**3a**)**

Yellow solid. 0.0532g, 88% total yield, R<sub>f</sub> = 0.5 (PE/ EA = 10/1).

<sup>1</sup>H NMR (400 MHz, CDCl<sub>3</sub>) δ 7.36 – 7.33 (m, 4H), 7.15 – 7.11 (m, 6H), 7.03 – 6.99 (m, 2H), 6.79 – 6.74 (m, 2H), 6.65 – 6.59 (m, 4H), 3.91 (s,

6H) ppm; <sup>13</sup>C NMR (100 MHz, CDCl<sub>3</sub>) δ 143.5, 139.2, 132.9, 128.0, 126.4, 126.3, 124.9, 122.5, 120.0, 120.0, 118.4, 110.3, 31.3 ppm.

**HRMS (ESI) *m/z*:** calcd for C<sub>30</sub>H<sub>24</sub>N<sub>2</sub>NaO<sub>4</sub>S<sub>4</sub><sup>+</sup> [M+Na]<sup>+</sup> 627.0511, found: 627.0520.

**IR (neat, ν):** 2926, 1724, 1610, 1447, 1325 cm<sup>-1</sup>.

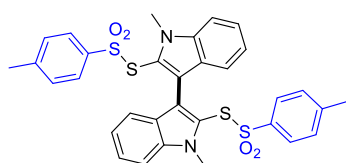

***S,S'*-(1,1'-dimethyl-1H,1'H-[3,3'-biindole]-2,2'-diyl) bis(4-methylbenzenesulfonylthioate) (**3b**)**

Yellow solid. 0.0499g, 79% total yield, R<sub>f</sub> = 0.5 (PE/ EA = 10/1).

<sup>1</sup>H NMR (400 MHz, CDCl<sub>3</sub>) δ 7.36 – 7.34 (m, 4H), 7.12 – 7.09 (m, 2H), 7.04 – 7.01 (m, 2H), 7.00 – 6.97 (m, 4H), 6.45 – 6.40 (m, 4H),

3.94 (s, 6H), 1.94 (s, 6H) ppm; <sup>13</sup>C NMR (100 MHz, CDCl<sub>3</sub>) δ 144.2, 140.7, 139.2, 128.8, 126.6, 126.2, 124.8, 122.4, 120.3, 119.9, 118.3, 110.3, 31.3, 21.7 ppm.

**HRMS (ESI)  $m/z$ :** calcd for  $C_{32}H_{28}N_2NaO_4S_4^+$   $[M+Na]^+$  655.0824, found: 655.0829.

**IR (neat,  $\nu$ ):** 2925, 2360, 1592, 1448, 1326  $cm^{-1}$ .

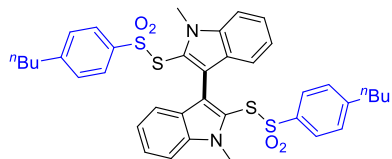

***S,S'*-(1,1'-dimethyl-1H,1'H-[3,3'-biindole]-2,2'-diyl) bis(4-butylbenzenesulfonothioate) (3c)**

Yellow solid. 0.0301g, 42% total yield,  $R_f = 0.5$  (PE/EA = 10/1).

**$^1H$  NMR** (400 MHz,  $CDCl_3$ )  $\delta$  7.38 – 7.31 (m, 4H), 7.21 (s, 2H), 7.09 – 7.00 (m, 6H), 6.49 – 6.39 (m, 4H), 3.90 (s, 6H), 2.27 – 2.16 (m, 4H), 1.32 – 1.23 (m, 5H), 1.22 – 1.17 (m, 3H), 0.87 (t,  $J = 7.2$  Hz, 6H) ppm;  **$^{13}C$  NMR** (100 MHz,  $CDCl_3$ )  $\delta$  149.1, 141.2, 139.2, 128.2, 126.6, 126.5, 124.8, 122.3, 120.6, 120.0, 118.5, 110.3, 35.5, 32.8, 31.3, 22.3, 14.0 ppm.

**HRMS (ESI)  $m/z$ :** calcd for  $C_{38}H_{40}N_2NaO_4S_4^+$   $[M+Na]^+$  739.1763, found: 739.1736.

**IR (neat,  $\nu$ ):** 2924, 1729, 1591, 1452, 1328  $cm^{-1}$ .

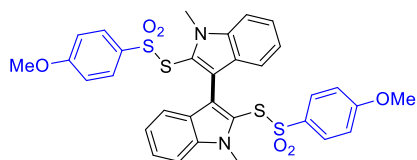

***S,S'*-(1,1'-dimethyl-1H,1'H-[3,3'-biindole]-2,2'-diyl) bis(4-methoxybenzenesulfonothioate) (3d)**

Yellow solid. 0.0498g, 75% total yield,  $R_f = 0.4$  (PE/EA = 10/1).

**$^1H$  NMR** (400 MHz,  $CDCl_3$ )  $\delta$  7.37 – 7.31 (m, 4H), 7.12 – 7.10 (m, 2H), 7.05 – 6.98 (m, 6H), 6.09 – 6.05 (m, 4H), 3.95 (s, 6H), 3.52 (s, 6H) ppm;  **$^{13}C$  NMR** (100 MHz,  $CDCl_3$ )  $\delta$  163.0, 139.1, 135.2, 128.9, 126.3, 124.7, 122.2, 120.7, 119.8, 118.3, 113.2, 110.2, 55.3, 31.4 ppm.

**HRMS (ESI)  $m/z$ :** calcd for  $C_{32}H_{28}N_2NaO_6S_4^+$   $[M+Na]^+$  687.0722, found: 687.0707.

**IR (neat,  $\nu$ ):** 2940, 1717, 1589, 1493, 1312  $cm^{-1}$ .

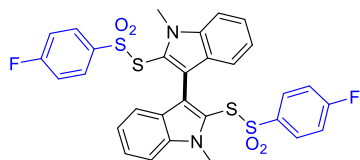

***S,S'*-(1,1'-dimethyl-1H,1'H-[3,3'-biindole]-2,2'-diyl) bis(4-fluorobenzenesulfonothioate) (3e)**

Yellow solid. 0.0179g, 28% total yield,  $R_f = 0.5$  (PE/EA = 10/1).

**$^1H$  NMR** (400 MHz,  $CDCl_3$ )  $\delta$  7.42 – 7.37 (m, 4H), 7.16 – 7.09 (m, 6H), 7.08 – 7.04 (m, 2H), 6.31 – 6.23 (m, 4H), 3.97 (s, 6H) ppm;  **$^{13}C\{^1H\}$  NMR** (100 MHz,  $CDCl_3$ )  $\delta = 164.9$  (d,  $J_{C-F} = 256.0$  Hz), 139.4 (d,  $J_{C-F} = 3.0$  Hz), 139.2, 129.4 (d,  $J_{C-F} = 10.0$  Hz), 126.1, 125.4, 121.2, 120.4, 119.9, 118.3, 115.5 (d,  $J_{C-F} = 22.0$  Hz), 110.5, 31.4 ppm.

**HRMS (ESI)  $m/z$ :** calcd for  $C_{30}H_{22}F_2N_2NaO_4S_4^+$   $[M+Na]^+$  663.0323, found: 663.0331.

**IR (neat,  $\nu$ ):** 2961, 1587, 1488, 1446, 1329  $cm^{-1}$ .

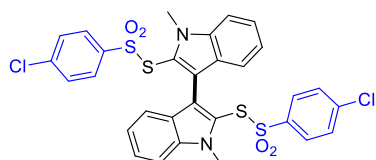

***S,S'*-(1,1'-dimethyl-1H,1'H-[3,3'-biindole]-2,2'-diyl) bis(4-chlorobenzenesulfonothioate) (3f)**

Yellow solid. 0.0436g, 65% total yield,  $R_f = 0.5$  (PE/EA = 10/1).

**$^1H$  NMR** (400 MHz,  $CDCl_3$ )  $\delta$  7.46 – 7.36 (m, 4H), 7.11 (s, 4H), 7.07 – 6.95 (m, 4H), 6.64 – 6.49 (m, 4H), 3.96 (s, 6H) ppm;  **$^{13}C\{^1H\}$  NMR** (100 MHz,  $CDCl_3$ )  $\delta$  142.1, 139.9, 139.2, 128.5, 127.9, 126.2, 125.6, 121.8, 120.7, 119.7, 118.4, 110.7, 31.4 ppm.

**HRMS (ESI)  $m/z$ :** calcd for  $C_{30}H_{22}Cl_2N_2NaO_4S_4^+$   $[M+Na]^+$  694.9732, found: 694.9707.

**IR (neat,  $\nu$ ):** 2924, 1572, 1446, 1393, 1331  $cm^{-1}$ .

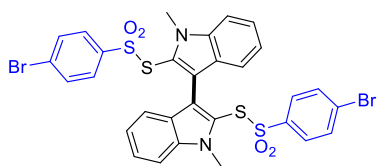

***S,S'*-(1,1'-dimethyl-1H,1'H-[3,3'-biindole]-2,2'-diyl) bis(4-bromobenzenesulfonothioate) (3g)**

Yellow solid. 0.0464g, 61% total yield,  $R_f = 0.5$  (PE/ EA = 10/1).

$^1\text{H NMR}$  (400 MHz,  $\text{CDCl}_3$ )  $\delta$  7.46 – 7.41 (m, 4H), 7.14 – 7.11 (m, 4H), 6.99 – 6.95 (m, 4H), 6.76 – 6.72 (m, 4H), 3.95 (s, 6H)

ppm;  $^{13}\text{C}\{^1\text{H}\}\text{NMR}$  (100 MHz,  $\text{CDCl}_3$ )  $\delta$  142.8, 139.2, 131.5, 128.6, 127.9, 126.3, 125.7, 121.8, 120.8, 119.7, 118.4, 110.8, 31.4 ppm.

**HRMS (ESI)  $m/z$ :** calcd for  $\text{C}_{30}\text{H}_{22}\text{Br}_2\text{N}_2\text{NaO}_4\text{S}_4^+$   $[\text{M}+\text{Na}]^+$  782.8721, found: 782.8728.

**IR (neat,  $\nu$ ):** 2927, 1728, 1566, 1448, 1326  $\text{cm}^{-1}$ .

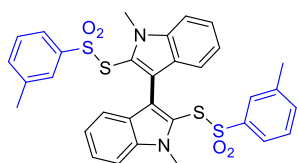

***S,S'*-(1,1'-dimethyl-1H,1'H-[3,3'-biindole]-2,2'-diyl) bis(2-methylbenzenesulfonothioate) (3h)**

Yellow solid. 0.0525g, 83% total yield,  $R_f = 0.5$  (PE/ EA = 10/1).

$^1\text{H NMR}$  (400 MHz,  $\text{CDCl}_3$ )  $\delta$  7.35 (s, 4H), 7.12 – 6.93 (m, 6H), 6.92 – 6.80 (m, 2H), 6.63 – 6.37 (m, 4H), 3.96 (s, 6H), 1.87 (s, 6H) ppm;

$^{13}\text{C}\{^1\text{H}\}\text{NMR}$  (100 MHz,  $\text{CDCl}_3$ )  $\delta$  143.0, 139.0, 138.4, 134.0, 127.8, 126.7, 126.2, 124.9, 123.9, 122.3, 120.0, 119.8, 118.5, 110.1, 31.3, 21.0 ppm.

**HRMS (ESI)  $m/z$ :** calcd for  $\text{C}_{32}\text{H}_{28}\text{N}_2\text{NaO}_4\text{S}_4^+$   $[\text{M}+\text{Na}]^+$  655.0824, found: 655.0865.

**IR (neat,  $\nu$ ):** 2938, 2361, 1452, 1326  $\text{cm}^{-1}$ .

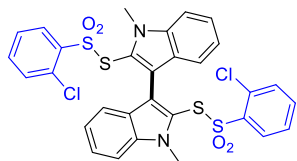

***S,S'*-(1,1'-dimethyl-1H,1'H-[3,3'-biindole]-2,2'-diyl) bis(2-chlorobenzenesulfonothioate) (3i)**

Yellow solid. 0.0262g, 39% total yield,  $R_f = 0.5$  (PE/ EA = 10/1).

$^1\text{H NMR}$  (400 MHz,  $\text{CDCl}_3$ )  $\delta$  7.36 – 7.32 (m, 2H), 7.31 – 7.26 (m, 2H), 7.19 – 7.14 (m, 2H), 6.89 – 6.84 (m, 4H), 6.55 – 6.48 (m, 4H), 6.47 –

6.42 (m, 2H), 4.04 (s, 6H) ppm;  $^{13}\text{C}\{^1\text{H}\}\text{NMR}$  (100 MHz,  $\text{CDCl}_3$ )  $\delta$  139.1, 138.8, 133.5, 130.8, 130.7, 130.4, 126.3, 125.7, 124.9, 122.6, 119.7, 119.5, 118.3, 110.2, 31.3 ppm.

**HRMS (ESI)  $m/z$ :** calcd for  $\text{C}_{30}\text{H}_{22}\text{Cl}_2\text{N}_2\text{NaO}_4\text{S}_4^+$   $[\text{M}+\text{Na}]^+$  694.9732, found: 694.9726.

**IR (neat,  $\nu$ ):** 3052, 2931, 1611, 1570, 1448, 1321  $\text{cm}^{-1}$ .

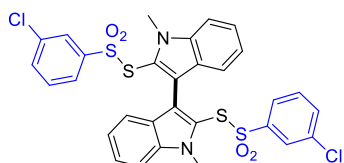

***S,S'*-(1,1'-dimethyl-1H,1'H-[3,3'-biindole]-2,2'-diyl) bis(3-chlorobenzenesulfonothioate) (3j)**

Yellow solid. 0.0174g, 26% total yield,  $R_f = 0.5$  (PE/ EA = 10/1).

$^1\text{H NMR}$  (400 MHz,  $\text{CDCl}_3$ )  $\delta$  7.42 – 7.34 (m, 4H), 7.19 – 7.14 (m, 2H), 7.05 – 6.98 (m, 4H), 6.97 – 6.92 (m, 2H), 6.56 – 6.49 (m, 2H),

6.46 – 6.39 (m, 2H), 4.02 (s, 6H) ppm;  $^{13}\text{C}\{^1\text{H}\}\text{NMR}$  (100 MHz,  $\text{CDCl}_3$ )  $\delta$  144.3, 139.1, 134.2, 132.9, 129.1, 126.3, 125.9, 125.3, 124.8, 122.3, 120.2, 119.0, 118.3, 110.6, 31.5 ppm.

**HRMS (ESI)  $m/z$ :** calcd for  $\text{C}_{30}\text{H}_{22}\text{Cl}_2\text{N}_2\text{NaO}_4\text{S}_4^+$   $[\text{M}+\text{Na}]^+$  694.9732, found: 694.9697.

**IR (neat,  $\nu$ ):** 3055, 2932, 1731, 1573, 1449, 1329  $\text{cm}^{-1}$ .

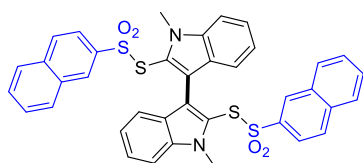

***S,S'*-(1,1'-dimethyl-1H,1'H-[3,3'-biindole]-2,2'-diyl)bis(naphthalene-2-sulfonylthioate) (3k)**

Yellow solid. 0.0493g, 70% total yield,  $R_f = 0.5$  (PE/EA = 10/1).

$^1\text{H NMR}$  (400 MHz,  $\text{CDCl}_3$ )  $\delta$  7.67 (s, 2H), 7.46 – 7.36 (m, 8H), 7.08 – 6.98 (m, 6H), 6.95 – 6.90 (m, 2H), 6.56 – 6.50 (m, 2H),

6.41 – 6.34 (m, 2H), 3.86 (s, 6H) ppm;  $^{13}\text{C}\{^1\text{H}\}\text{NMR}$  (100 MHz,  $\text{CDCl}_3$ )  $\delta$  140.2, 138.7, 134.6, 131.2, 129.2, 128.8, 128.5, 128.1, 127.3, 125.6, 124.9, 121.2, 121.0, 119.7, 119.6, 118.5, 109.7, 31.2 ppm.

**HRMS (ESI)  $m/z$ :** calcd for  $\text{C}_{38}\text{H}_{28}\text{N}_2\text{NaO}_4\text{S}_4^+$   $[\text{M}+\text{Na}]^+$  727.0824, found: 727.0780.

**IR (neat,  $\nu$ ):** 3053, 2927, 1736, 1610, 1451, 1315  $\text{cm}^{-1}$ .

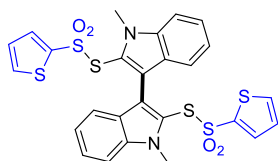

***S,S'*-(1,1'-dimethyl-1H,1'H-[3,3'-biindole]-2,2'-diyl)bis(thiophene-2-sulfonylthioate) (3l)**

Yellow solid. 0.0185g, 30% total yield,  $R_f = 0.5$  (PE/EA = 10/1).

$^1\text{H NMR}$  (400 MHz,  $\text{CDCl}_3$ )  $\delta$  7.42 – 7.35 (m, 4H), 7.28 – 7.26 (m, 1H), 7.26 – 7.24 (m, 1H), 7.08 – 7.03 (m, 2H), 6.87 – 6.82 (m, 2H), 6.77 – 6.71

(m, 2H), 6.09 – 6.01 (m, 2H), 3.97 (s, 6H) ppm;  $^{13}\text{C}\{^1\text{H}\}\text{NMR}$  (100 MHz,  $\text{CDCl}_3$ )  $\delta$  143.2, 139.4, 133.8, 133.3, 126.5, 126.4, 125.2, 122.8, 120.3, 120.0, 118.7, 110.4, 31.4 ppm.

**HRMS (ESI)  $m/z$ :** calcd for  $\text{C}_{26}\text{H}_{20}\text{N}_2\text{NaO}_4\text{S}_6^+$   $[\text{M}+\text{Na}]^+$  638.9640, found: 638.9613.

**IR (neat,  $\nu$ ):** 3088, 2925, 1725, 1608, 1448, 1326  $\text{cm}^{-1}$ .

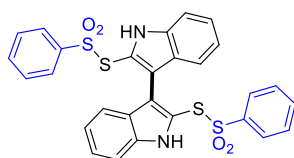

***S,S'*-(1H,1'H-[3,3'-biindole]-2,2'-diyl)dibenzenesulfonylthioate (3m)**

Yellow solid. 0.0263g, 42% total yield,  $R_f = 0.5$  (PE/EA = 10/1).

$^1\text{H NMR}$  (400 MHz,  $\text{CDCl}_3$ )  $\delta$  8.85 (s, 2H), 7.45 – 7.39 (m, 2H), 7.34 – 7.28 (m, 2H), 7.24 – 7.16 (m, 4H), 7.04 – 6.95 (m, 4H), 6.94 – 6.87 (m,

2H), 6.82 – 6.69 (m, 4H) ppm;  $^{13}\text{C}\{^1\text{H}\}\text{NMR}$  (100 MHz,  $\text{CDCl}_3$ )  $\delta$  142.9, 137.8, 133.5, 128.4, 126.8, 126.7, 125.2, 122.0, 120.3, 117.9, 117.7, 111.6 ppm.

**HRMS (ESI)  $m/z$ :** calcd for  $\text{C}_{28}\text{H}_{20}\text{N}_2\text{NaO}_4\text{S}_4^+$   $[\text{M}+\text{Na}]^+$  599.0198, found: 599.0196.

**IR (neat,  $\nu$ ):** 3333, 1617, 1577, 1447, 1306  $\text{cm}^{-1}$ .

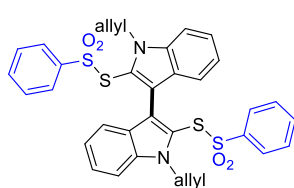

***S,S'*-(1,1'-diallyl-1H,1'H-[3,3'-biindole]-2,2'-diyl)dibenzenesulfonylthioate (3n)**

Yellow solid. 0.0413g, 72% total yield,  $R_f = 0.5$  (PE/EA = 10/1).

$^1\text{H NMR}$  (400 MHz,  $\text{CDCl}_3$ )  $\delta$  7.38 – 7.33 (m, 4H), 7.24 – 7.20 (m, 2H), 7.18 – 7.13 (m, 4H), 7.07 – 7.02 (m, 2H), 6.80 – 6.74 (m, 2H), 6.66 –

6.59 (m, 4H), 6.01 – 5.90 (m, 2H), 5.29 (dd,  $J = 17.3, 5.0$  Hz, 2H), 5.17 (d,  $J = 10.5$  Hz, 2H), 4.91 (dd,  $J = 17.2, 5.2$  Hz, 2H), 4.78 (d,  $J = 17.2$  Hz, 2H) ppm;  $^{13}\text{C}\{^1\text{H}\}\text{NMR}$  (100 MHz,  $\text{CDCl}_3$ )  $\delta$  143.5, 138.6, 133.1, 133.1, 128.3, 128.3, 128.2, 126.5, 126.3, 125.0, 122.5, 120.2, 119.9, 118.7, 116.9, 110.9, 46.9 ppm.

**HRMS (ESI)  $m/z$ :** calcd for  $\text{C}_{34}\text{H}_{28}\text{N}_2\text{NaO}_4\text{S}_4^+$   $[\text{M}+\text{Na}]^+$  679.0824, found: 679.0838.

**IR (neat,  $\nu$ ):** 3057, 2924, 1730, 1609, 1565, 1444  $\text{cm}^{-1}$ .

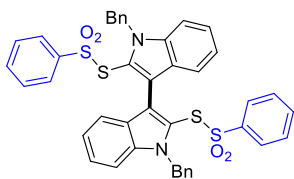

***S,S'*-(1,1'-dibenzyl-1H,1'H-[3,3'-biindole]-2,2'-diyl) dibenzenesulfonothioate (3o)**

Yellow solid. 0.0302g, 40% total yield,  $R_f = 0.5$  (PE/ EA = 10/1).

$^1\text{H NMR}$  (400 MHz,  $\text{CDCl}_3$ )  $\delta$  7.40 – 7.27 (m, 11H), 7.21 – 7.17 (m, 2H), 7.15 – 7.09 (m, 7H), 7.04 – 6.99 (m, 2H), 6.67 – 6.61 (m, 2H), 6.51 –

6.41 (m, 4H), 6.07 (d,  $J = 16.7$  Hz, 2H), 5.36 (d,  $J = 16.7$  Hz, 2H) ppm;  $^{13}\text{C}\{^1\text{H}\}\text{NMR}$  (100 MHz,  $\text{CDCl}_3$ )  $\delta$  143.3, 138.5, 137.4, 133.3, 128.8, 128.4, 127.9, 127.0, 126.6, 126.5, 125.2, 122.6, 120.6, 120.2, 119.0, 111.0, 48.1 ppm.

**HRMS (ESI)  $m/z$ :** calcd for  $\text{C}_{42}\text{H}_{32}\text{N}_2\text{NaO}_4\text{S}_4^+$   $[\text{M}+\text{Na}]^+$  779.1137, found: 779.1134.

**IR (neat,  $\nu$ ):** 3063, 2940, 2339, 1604, 1580, 1447, 1323  $\text{cm}^{-1}$ .

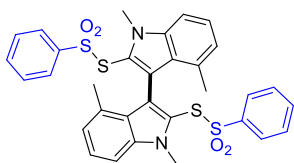

***S,S'*-(1,1',4,4'-tetramethyl-1H,1'H-[3,3'-biindole]-2,2'-diyl) dibenzenesulfonothioate (3p)**

Yellow solid. 0.0209g, 33% total yield,  $R_f = 0.5$  (PE/ EA = 10/1).

$^1\text{H NMR}$  (400 MHz,  $\text{CDCl}_3$ )  $\delta$  7.36 – 7.27 (m, 4H), 7.24 – 7.15 (m, 4H), 7.15 – 7.09 (m, 2H), 6.94 – 6.82 (m, 4H), 6.76 (d,  $J = 6.6$  Hz, 2H), 3.79

(s, 6H), 1.83 (s, 6H) ppm;  $^{13}\text{C}\{^1\text{H}\}\text{NMR}$  (100 MHz,  $\text{CDCl}_3$ )  $\delta$  144.7, 139.4, 133.4, 133.4, 128.4, 128.3, 126.3, 125.0, 122.5, 122.1, 120.9, 108.0, 31.2, 19.4 ppm.

**HRMS (ESI)  $m/z$ :** calcd for  $\text{C}_{32}\text{H}_{28}\text{N}_2\text{NaO}_4\text{S}_4^+$   $[\text{M}+\text{Na}]^+$  655.0824, found: 655.0845.

**IR (neat,  $\nu$ ):** 2922, 1731, 1602, 1446, 1325  $\text{cm}^{-1}$ .

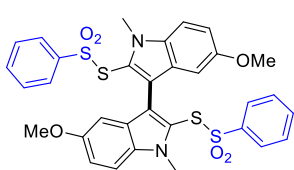

***S,S'*-(5,5'-dimethoxy-1,1'-dimethyl-1H,1'H-[3,3'-biindole]-2,2'-diyl) dibenzenesulfonothioate (3q)**

Yellow solid. 0.0359g, 54% total yield,  $R_f = 0.5$  (PE/ EA = 10/1).

$^1\text{H NMR}$  (400 MHz,  $\text{CDCl}_3$ )  $\delta$  7.30 – 7.26 (m, 2H), 7.20 – 7.14 (m, 4H), 7.05 – 7.03 (m, 1H), 7.03 – 6.98 (m, 1H), 6.90 – 6.83 (m, 2H), 6.70 –

6.63 (m, 4H), 6.47 – 6.43 (m, 2H), 3.92 (s, 6H), 3.69 (s, 6H) ppm;  $^{13}\text{C}\{^1\text{H}\}\text{NMR}$  (100 MHz,  $\text{CDCl}_3$ )  $\delta$  154.2, 143.6, 134.8, 132.8, 127.9, 126.5, 126.4, 119.9, 117.8, 116.6, 111.4, 102.4, 55.9, 31.4 ppm.

**HRMS (ESI)  $m/z$ :** calcd for  $\text{C}_{32}\text{H}_{28}\text{N}_2\text{NaO}_6\text{S}_4^+$   $[\text{M}+\text{Na}]^+$  687.0722, found: 687.0701.

**IR (neat,  $\nu$ ):** 2920, 1726, 1623, 1490, 1445, 1325  $\text{cm}^{-1}$ .

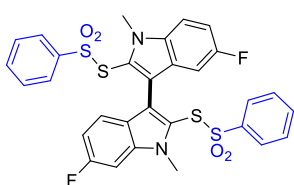

***S,S'*-(5,5'-difluoro-1,1'-dimethyl-1H,1'H-[3,3'-biindole]-2,2'-diyl) dibenzenesulfonothioate (3r)**

Yellow solid. 0.0160g, 25% total yield,  $R_f = 0.5$  (PE/ EA = 10/1).

$^1\text{H NMR}$  (400 MHz,  $\text{CDCl}_3$ )  $\delta$  7.32 – 7.27 (m, 2H), 7.19 – 7.07 (m, 6H), 6.92 – 6.85 (m, 2H), 6.78 – 6.68 (m, 4H), 6.62 (m, 2H), 3.92 (s, 6H) ppm;

$^{13}\text{C}\{^1\text{H}\}\text{NMR}$  (100 MHz,  $\text{CDCl}_3$ )  $\delta$  157.8 (d,  $J_{C-F} = 238.0$  Hz), 143.3, 135.8, 133.1, 128.1, 126.6, 126.1 (d,  $J_{C-F} = 10.0$  Hz), 121.9, 117.7 (d,  $J_{C-F} = 5.0$  Hz), 114.1 (d,  $J_{C-F} = 26.0$  Hz), 111.5 (d,  $J_{C-F} = 9.0$  Hz), 106.6 (d,  $J_{C-F} = 23.0$  Hz), 31.7 ppm.

**HRMS (ESI)  $m/z$ :** calcd for  $\text{C}_{30}\text{H}_{22}\text{F}_2\text{N}_2\text{NaO}_4\text{S}_4^+$   $[\text{M}+\text{Na}]^+$  663.0323, found: 663.0324.

**IR (neat,  $\nu$ ):** 2922, 1722, 1622, 1573, 1486, 1303  $\text{cm}^{-1}$ .

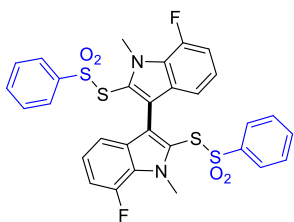

***S,S'*-(7,7'-difluoro-1,1'-dimethyl-1H,1'H-[3,3'-biindole]-2,2'-diyl) dibenzenesulfonothioate (3s)**

Yellow solid. 0.0275g, 43% total yield,  $R_f = 0.5$  (PE/ EA = 10/1).

$^1\text{H NMR}$  (400 MHz,  $\text{CDCl}_3$ )  $\delta$  7.20 – 7.15 (m, 4H), 7.03 – 6.97 (m, 2H), 6.94 – 6.84 (m, 6H), 6.78 – 6.72 (m, 4H), 4.09 (s, 6H) ppm;

$^{13}\text{C}\{^1\text{H}\}\text{NMR}$  (100 MHz,  $\text{CDCl}_3$ )  $\delta$  149.9 (d,  $J_{\text{C-F}}=245.0$  Hz), 143.7, 133.0, 129.7 (d,  $J_{\text{C-F}}=5.0$  Hz), 128.2, 127.7 (d,  $J_{\text{C-F}}=10.0$  Hz), 126.4, 122.2, 120.1 (d,  $J_{\text{C-F}}=6.0$  Hz), 118.6, 118.1 (d,  $J_{\text{C-F}}=4.0$  Hz), 110.1 (d,  $J_{\text{C-F}}=18.0$  Hz), 33.9 (d,  $J_{\text{C-F}}=7.0$  Hz) ppm.

**HRMS (ESI)  $m/z$ :** calcd for  $\text{C}_{30}\text{H}_{22}\text{F}_2\text{N}_2\text{NaO}_4\text{S}_4^+$  [ $\text{M}+\text{Na}$ ] $^+$  663.0323, found: 663.0322.

**IR (neat,  $\nu$ ):** 2960, 1727, 1627, 1573, 1509, 1448, 1384, 1319  $\text{cm}^{-1}$ .

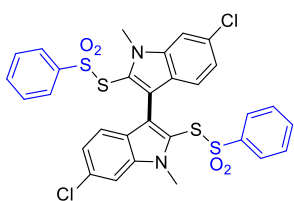

***S,S'*-(6,6'-dichloro-1,1'-dimethyl-1H,1'H-[3,3'-biindole]-2,2'-diyl) dibenzenesulfonothioate (3t)**

Yellow solid. 0.0248g, 37% total yield,  $R_f = 0.5$  (PE/ EA = 10/1).

$^1\text{H NMR}$  (400 MHz,  $\text{CDCl}_3$ )  $\delta$  7.38 – 7.34 (m, 2H), 7.18 – 7.12 (m, 4H), 7.01 – 6.95 (m, 4H), 6.93 – 6.87 (m, 2H), 6.77 – 6.71 (m, 4H), 3.86 (s, 6H) ppm;  $^{13}\text{C}\{^1\text{H}\}\text{NMR}$  (100 MHz,  $\text{CDCl}_3$ )  $\delta$  143.5, 139.4, 133.2, 131.4,

128.3, 126.6, 124.6, 123.1, 121.3, 121.2, 118.1, 110.3, 31.4 ppm.

**HRMS (ESI)  $m/z$ :** calcd for  $\text{C}_{30}\text{H}_{22}\text{Cl}_2\text{N}_2\text{NaO}_4\text{S}_4^+$  [ $\text{M}+\text{Na}$ ] $^+$  694.9732, found: 694.9739.

**IR (neat,  $\nu$ ):** 2960, 1728, 1605, 1561, 1446, 1320  $\text{cm}^{-1}$ .

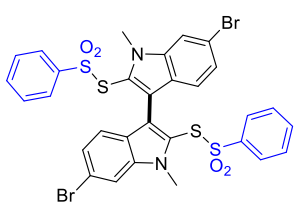

***S,S'*-(6,6'-dibromo-1,1'-dimethyl-1H,1'H-[3,3'-biindole]-2,2'-diyl) dibenzenesulfonothioate (3u)**

Yellow solid. 0.0266g, 35% total yield,  $R_f = 0.5$  (PE/ EA = 10/1).

$^1\text{H NMR}$  (400 MHz,  $\text{CDCl}_3$ )  $\delta$  7.53 (s, 2H), 7.18 – 7.09 (m, 6H), 6.94 – 6.86 (m, 4H), 6.78 – 6.70 (m, 4H), 3.86 (s, 6H) ppm;  $^{13}\text{C}\{^1\text{H}\}\text{NMR}$  (100 MHz,  $\text{CDCl}_3$ )  $\delta$  143.4, 139.7, 133.2, 128.3, 126.5, 124.9, 123.7, 123.3,

121.2, 119.1, 118.0, 113.4, 31.4 ppm.

**HRMS (ESI)  $m/z$ :** calcd for  $\text{C}_{30}\text{H}_{22}\text{Br}_2\text{N}_2\text{NaO}_4\text{S}_4^+$  [ $\text{M}+\text{Na}$ ] $^+$  782.8721, found: 782.8693.

**IR (neat,  $\nu$ ):** 2924, 1730, 1601, 1565, 1445, 1321  $\text{cm}^{-1}$ .



## 2.4 References

- (1) Pedras, M.S.C.; Jha, M. *J. Org. Chem.* **2005**, *70*, 1828-1834.
- (2) Tang, L.; Yang, Y.; Wen, L.-X.; Yang, X.-K.; Wang, Z.-Y. *Green Chem.* **2016**, *18*, 1224-1228.

### 3. X-Ray Crystallographic Data for 3m

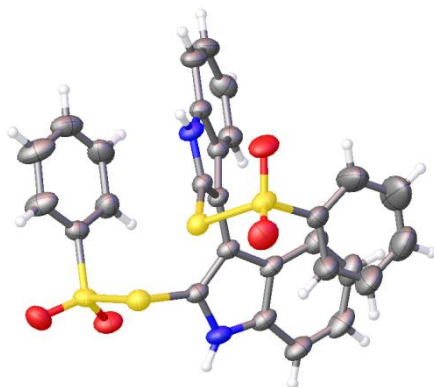

**Fig. S1.** Single crystal structure of 3m.

Crystal Number: CCDC 2085376

Empirical formula:  $C_{28}H_{20}N_2O_4S_4$

Formula weight: 626.98

Unit cell parameters:  $a = 20.1470 (13) \text{ \AA}$ ,  $b = 18.1094 (11) \text{ \AA}$ ,  $c = 17.9791 (12) \text{ \AA}$ ,

$\alpha = 90^\circ$ ,  $\beta = 116.264 (2)^\circ$ ,  $\gamma = 90^\circ$

Temperature: 296 (2) K

Wavelength: 0.71073  $\text{ \AA}$

Crystal system: Monoclinic

Volume: 5882.5 (7)  $\text{ \AA}^3$

Calculated density: 1.406  $\text{ Mg/m}^3$

Absorption coefficient: 0.364  $\text{ mm}^{-1}$

F (000): 2584

Device: Xcalibur, Atlas, Gemini

Measurement method: w scans

#### **4. EPR Studies of Interaction**

A dried tube equipped with a stir bar was loaded with TBHP (0.50 mmol) or the mixed solution of TBHP and indole-2-thione in 2.0 mL MeCN was stirred at 25 °C. After 5 mins, the solution sample was taken out into a small tube and analyzed by EPR. EPR spectra was recorded at room temperature on EPR spectrometer operated at 9.852 GHz. Typical spectrometer parameters are shown as follows, scan range: 1000 G; center field set: 3400 G; scan time: 35 s.

## 5. Copies of $^1\text{H}$ NMR and $^{13}\text{C}$ NMR Spectra

$^1\text{H}$  NMR spectra of **3a**

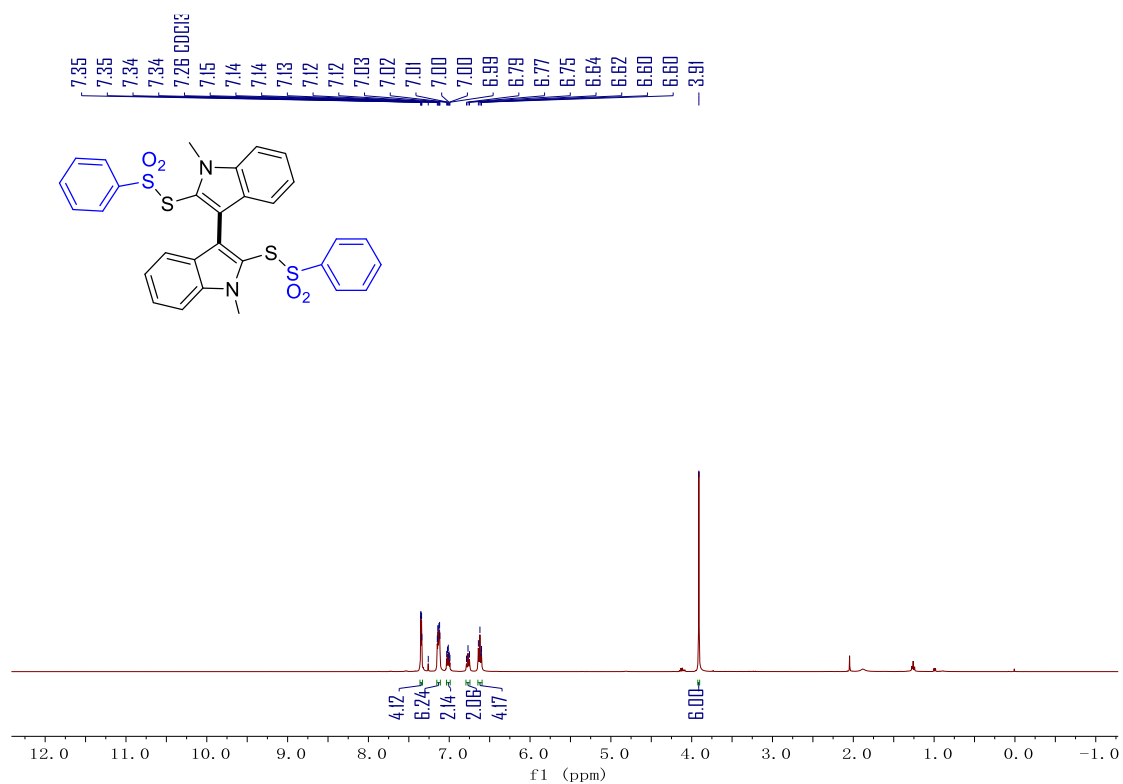

$^{13}\text{C}$  NMR spectra of **3a**

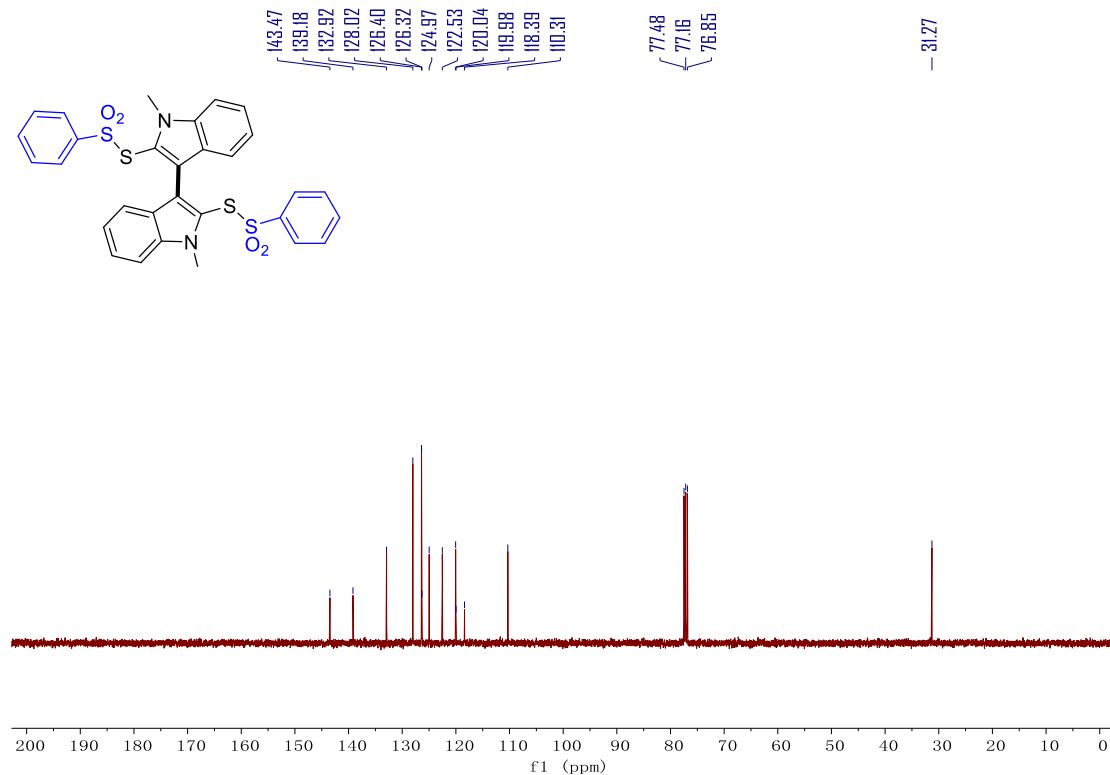

### <sup>1</sup>H NMR spectra of **3b**

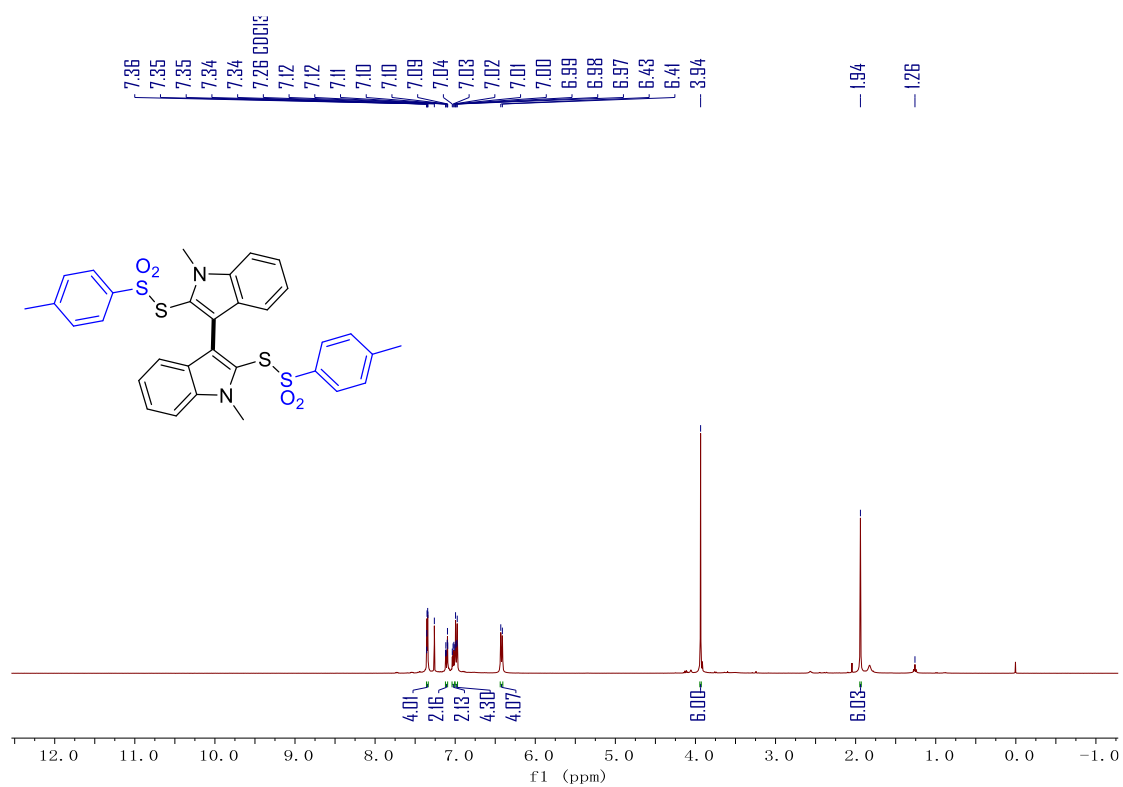

### <sup>13</sup>C NMR spectra of **3b**

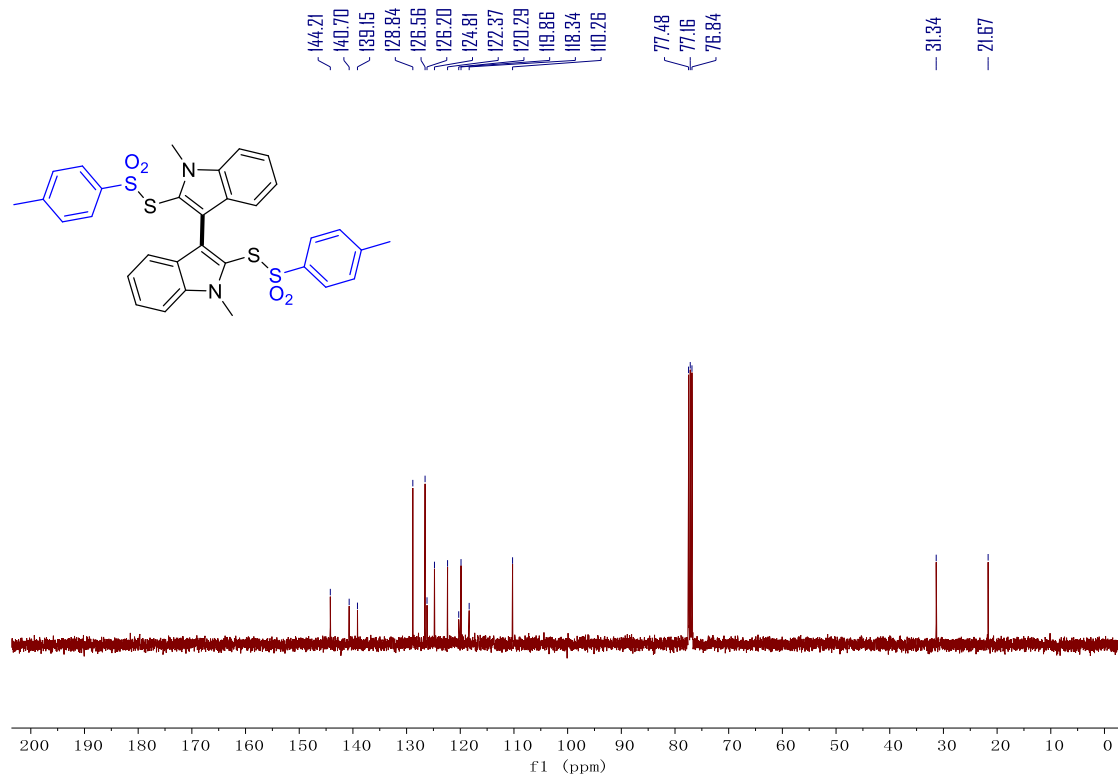

### <sup>1</sup>H NMR spectra of **3c**

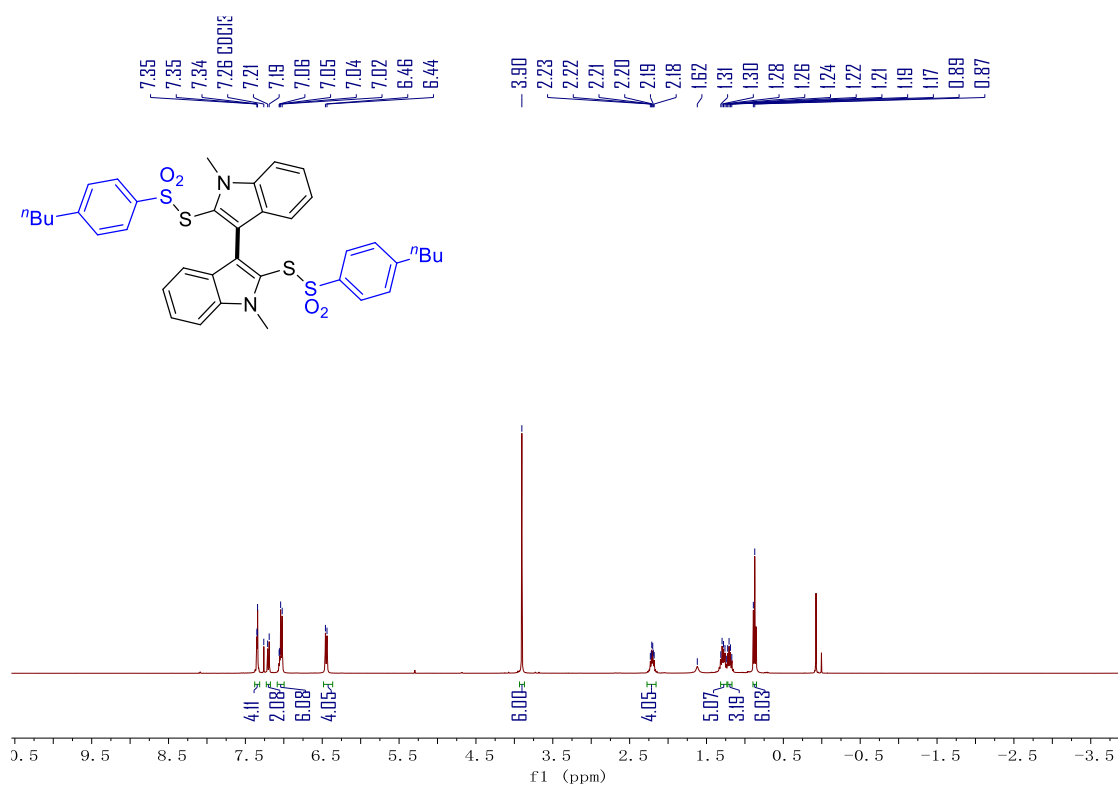

### <sup>13</sup>C NMR spectra of **3c**

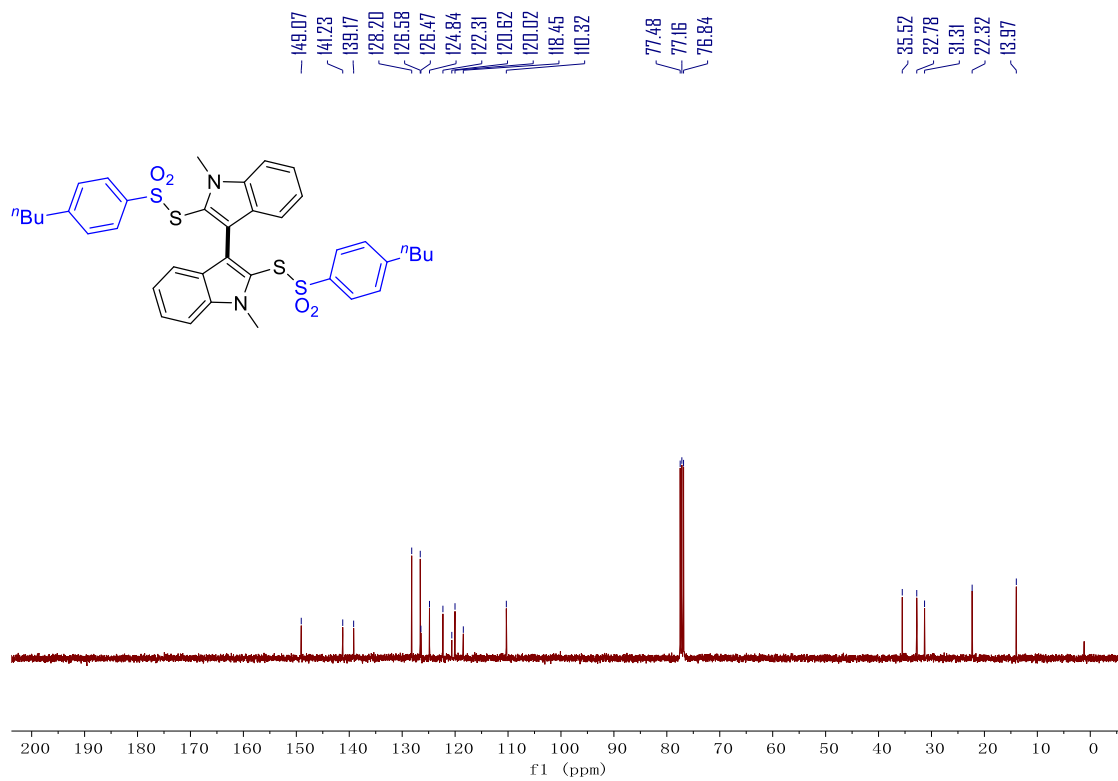

### <sup>1</sup>H NMR spectra of **3d**

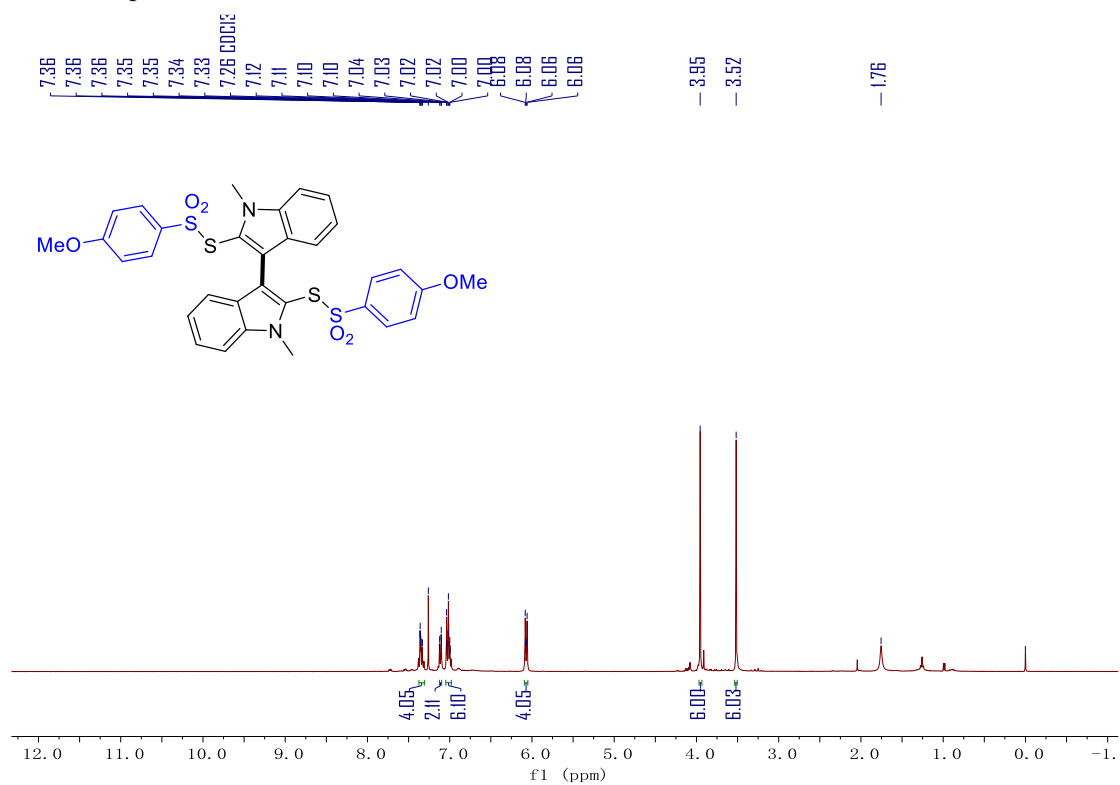

### <sup>13</sup>C NMR spectra of **3d**

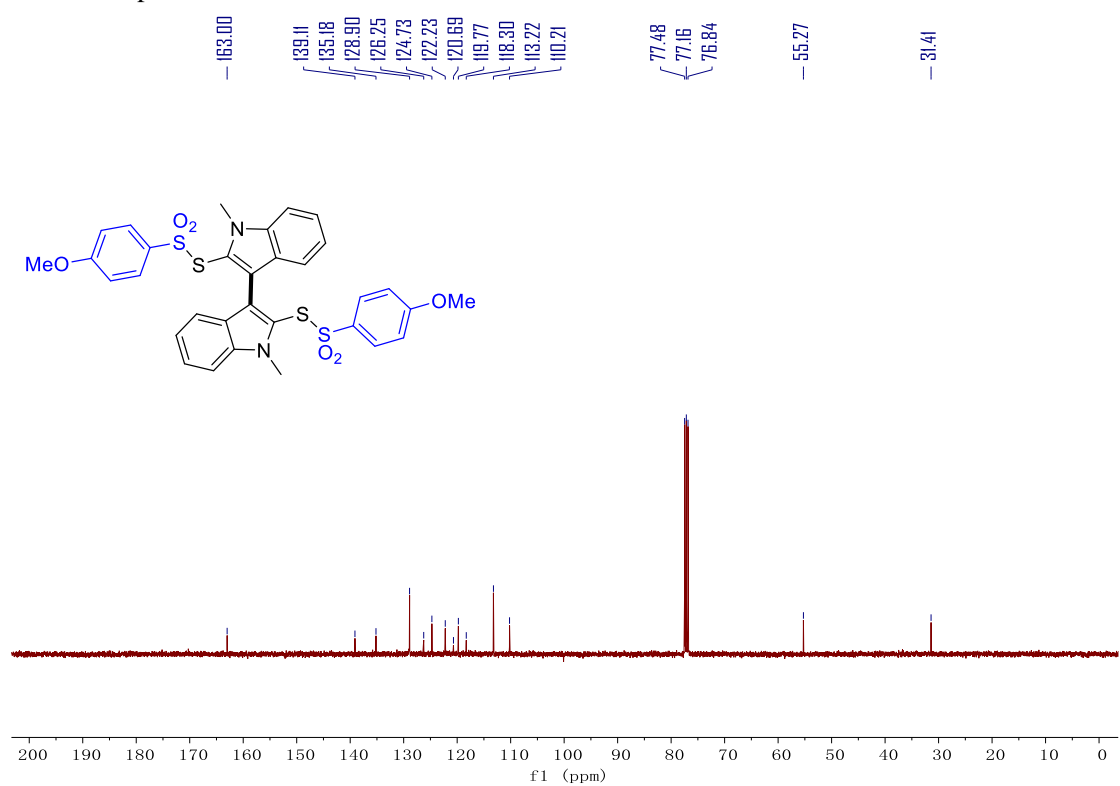

### <sup>1</sup>H NMR spectra of **3e**

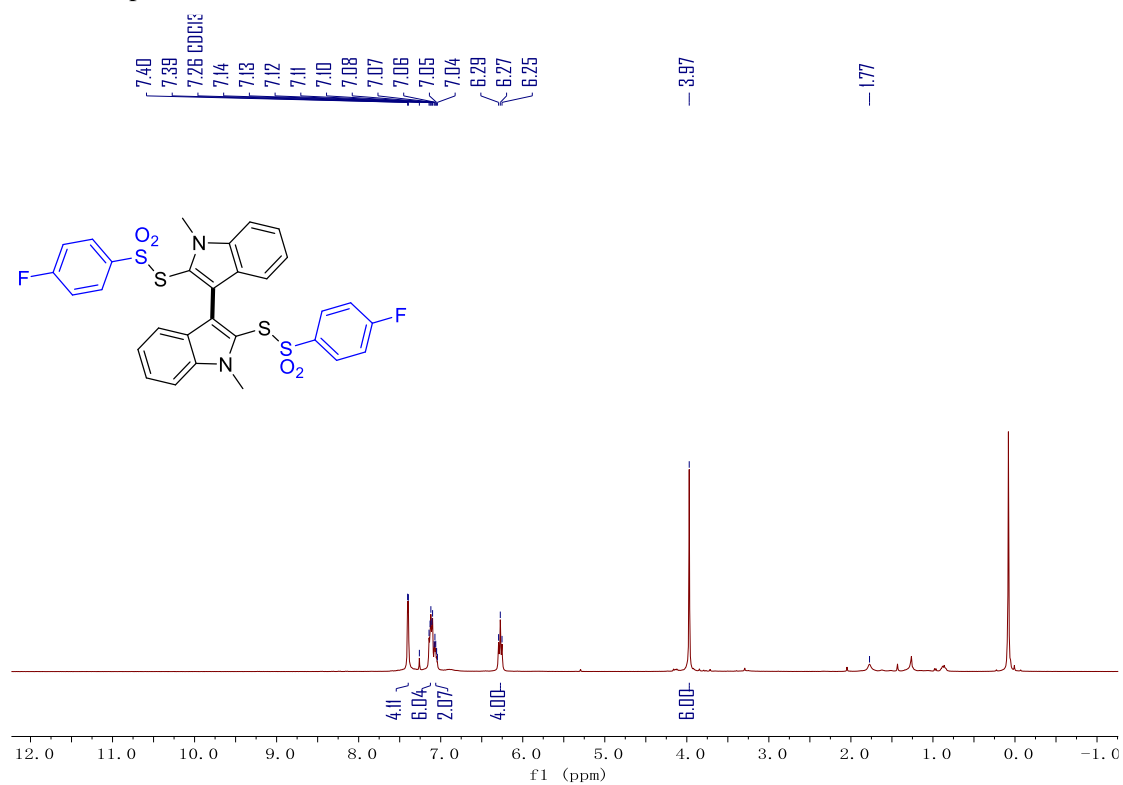

### <sup>13</sup>C NMR spectra of **3e**

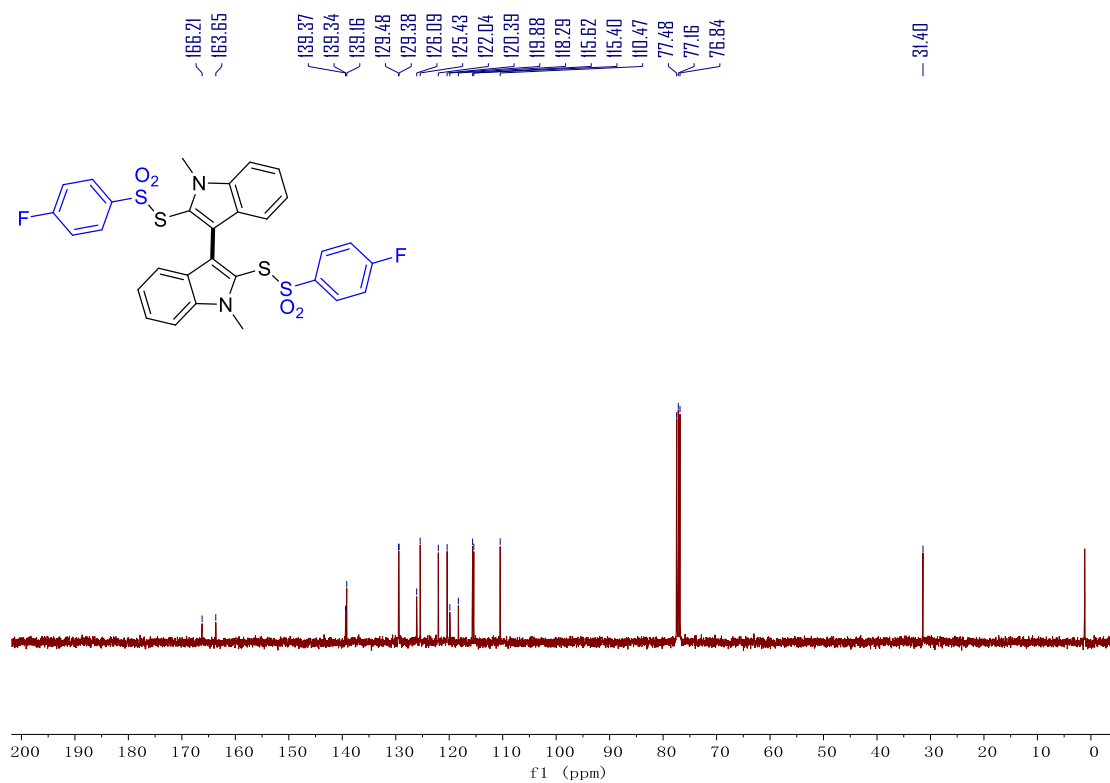



<sup>1</sup>H NMR spectra of **3f**

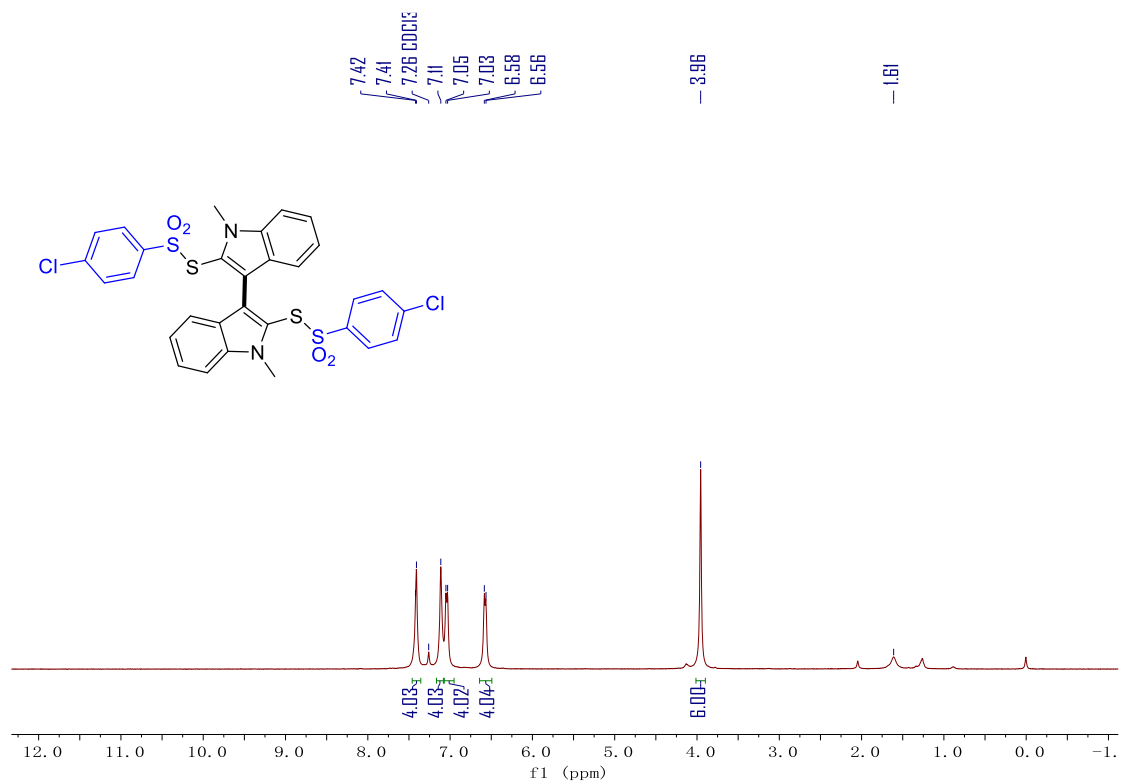

<sup>13</sup>C NMR spectra of **3f**

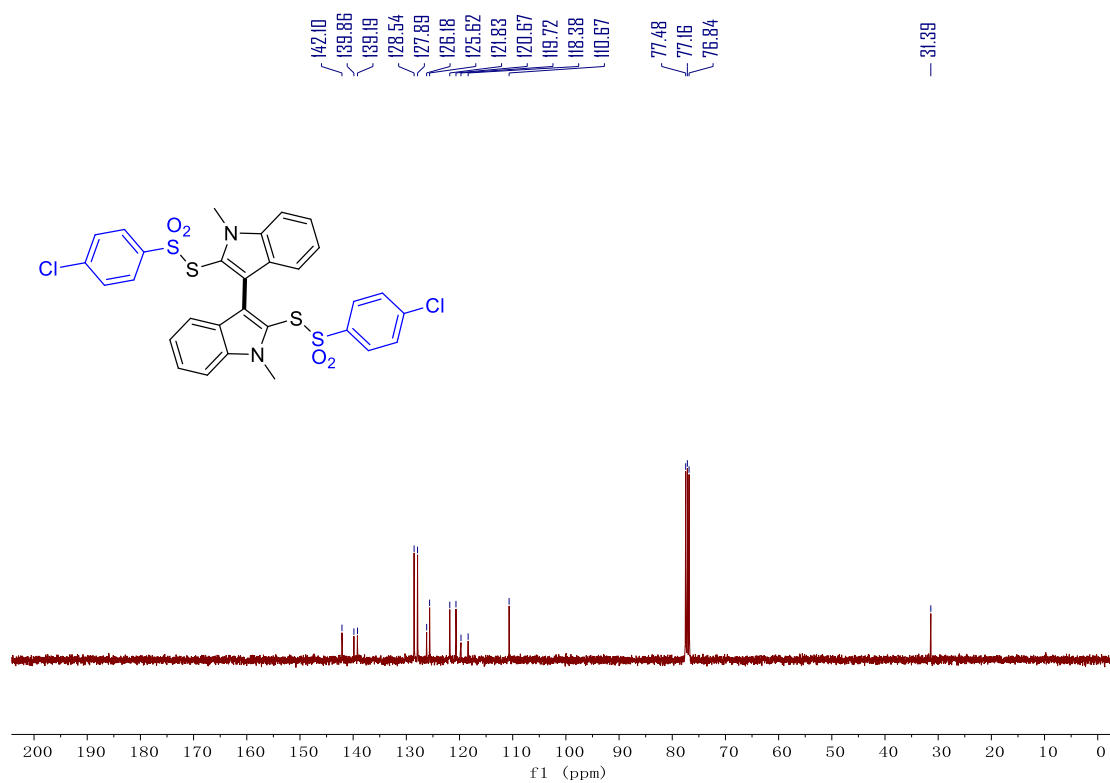

### <sup>1</sup>H NMR spectra of **3g**

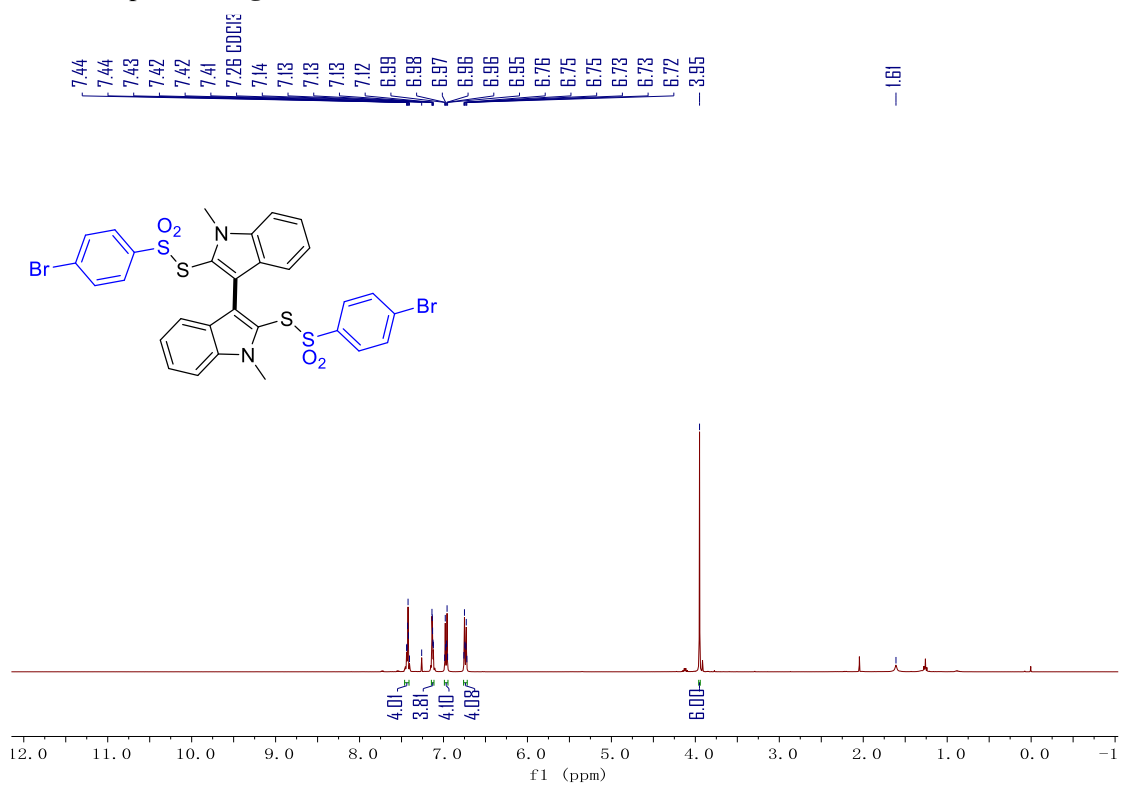

### <sup>13</sup>C NMR spectra of **3g**

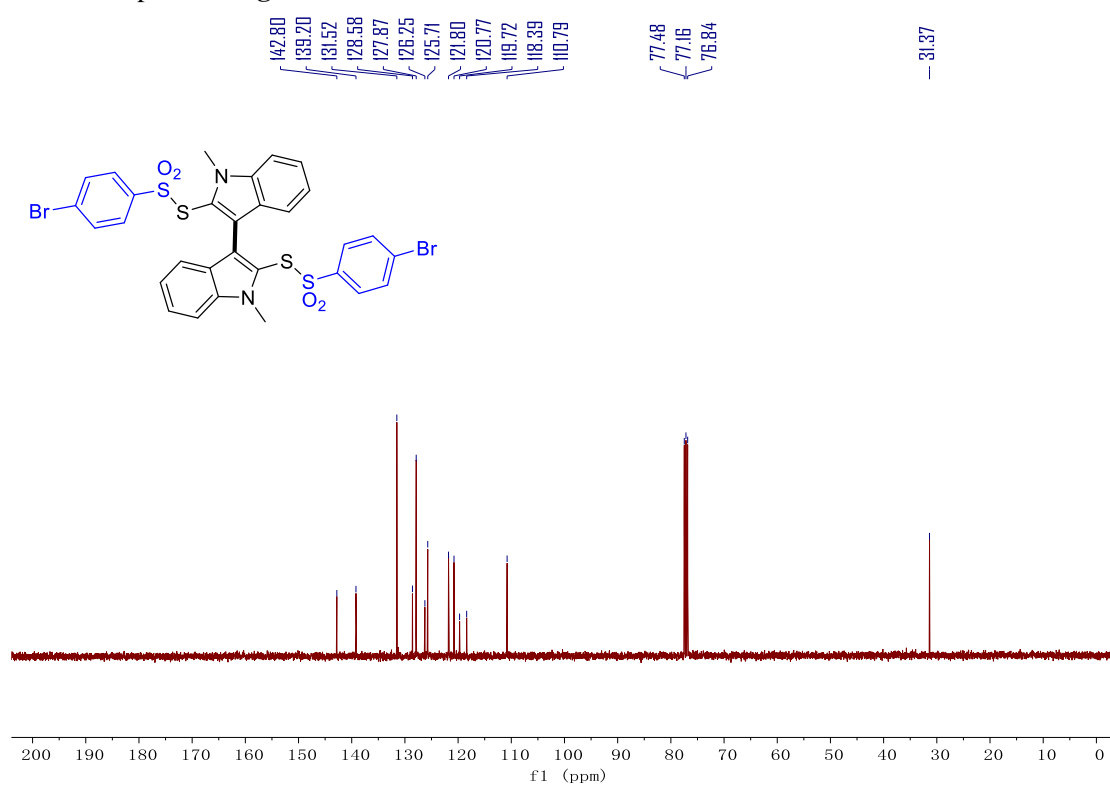

### <sup>1</sup>H NMR spectra of **3h**

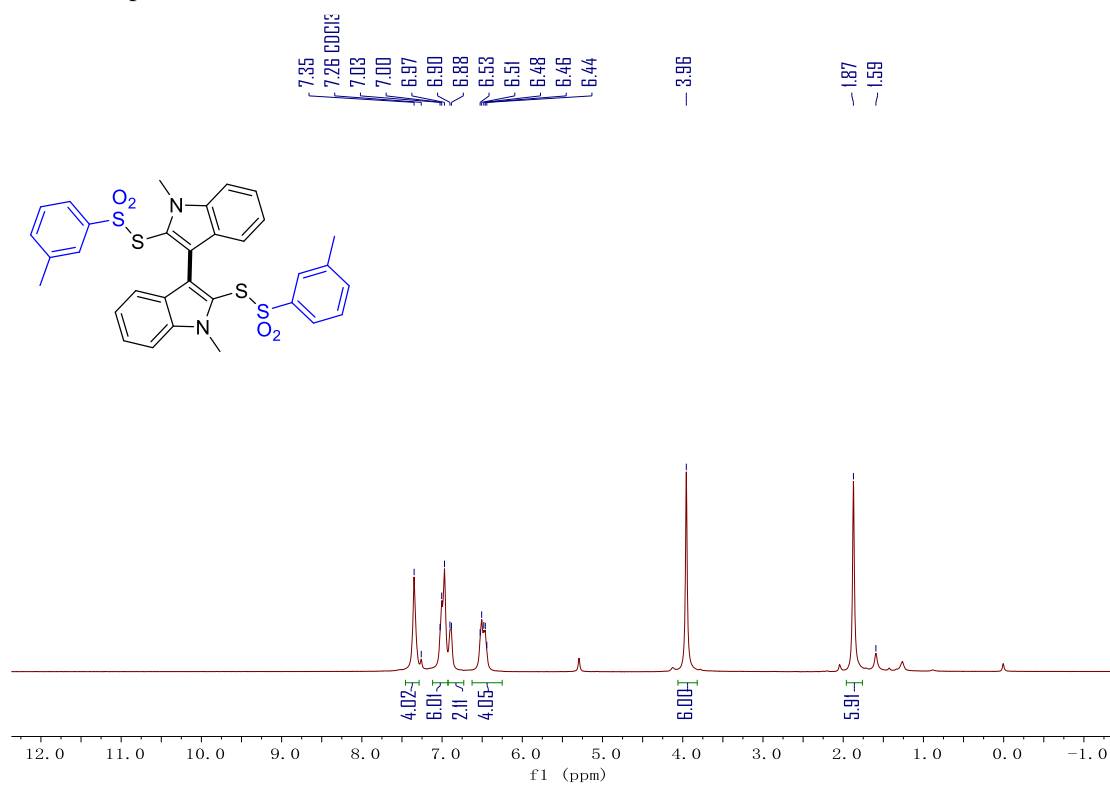

### <sup>13</sup>C NMR spectra of **3h**

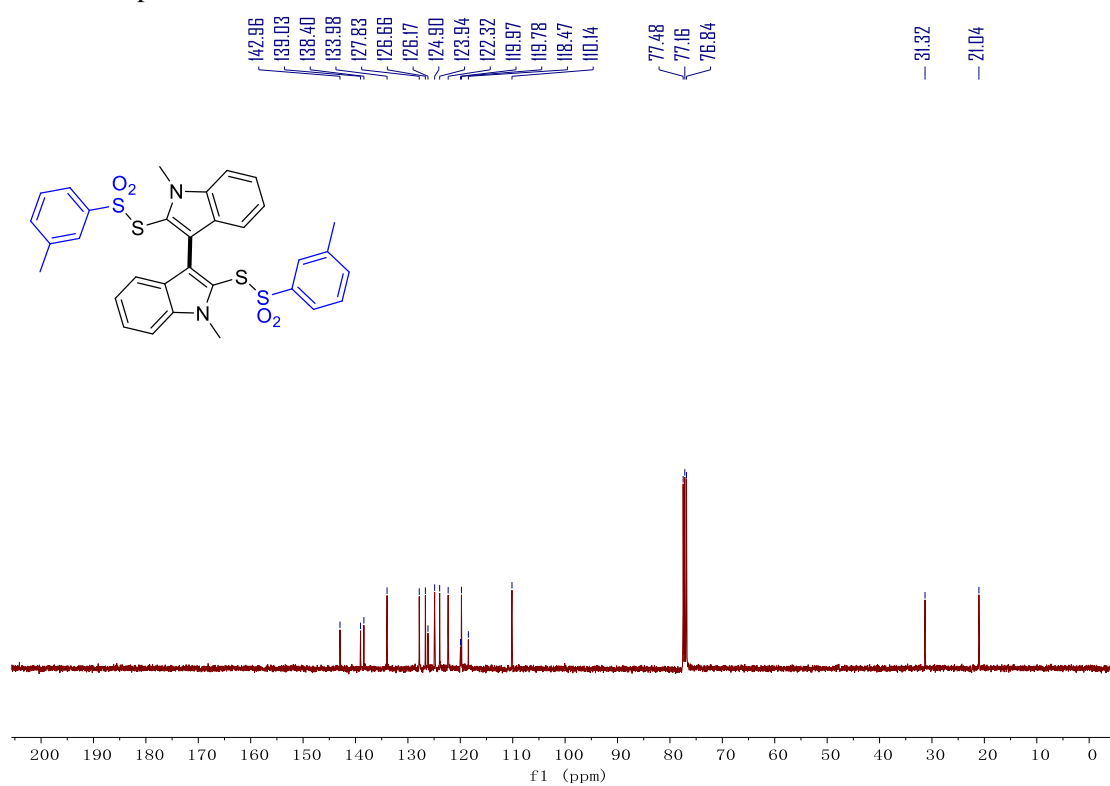

### <sup>1</sup>H NMR spectra of **3i**

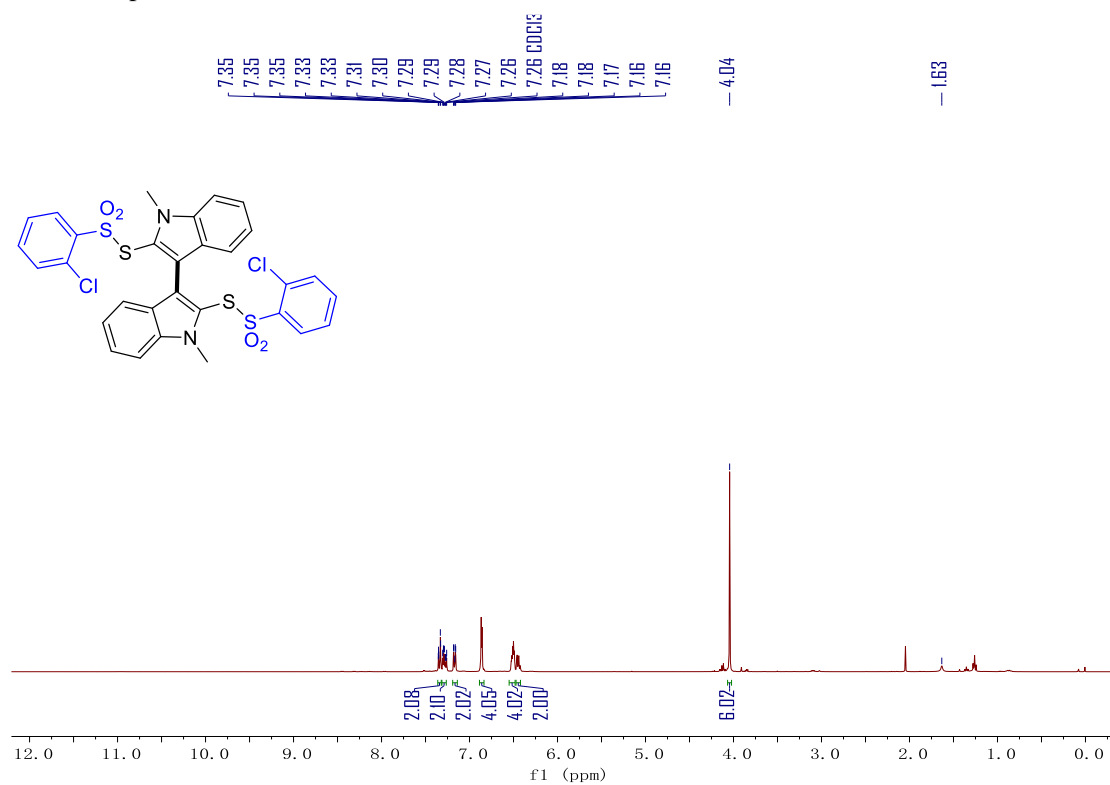

### <sup>13</sup>C NMR spectra of **3i**

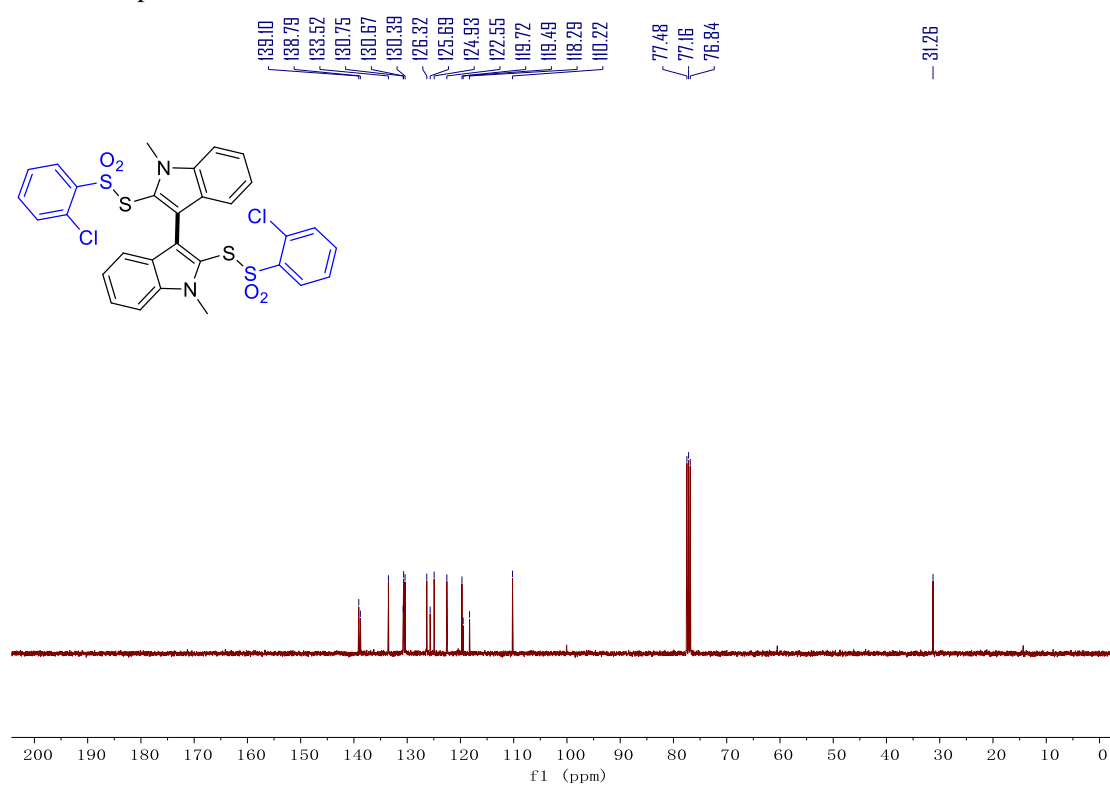

### <sup>1</sup>H NMR spectra of **3j**

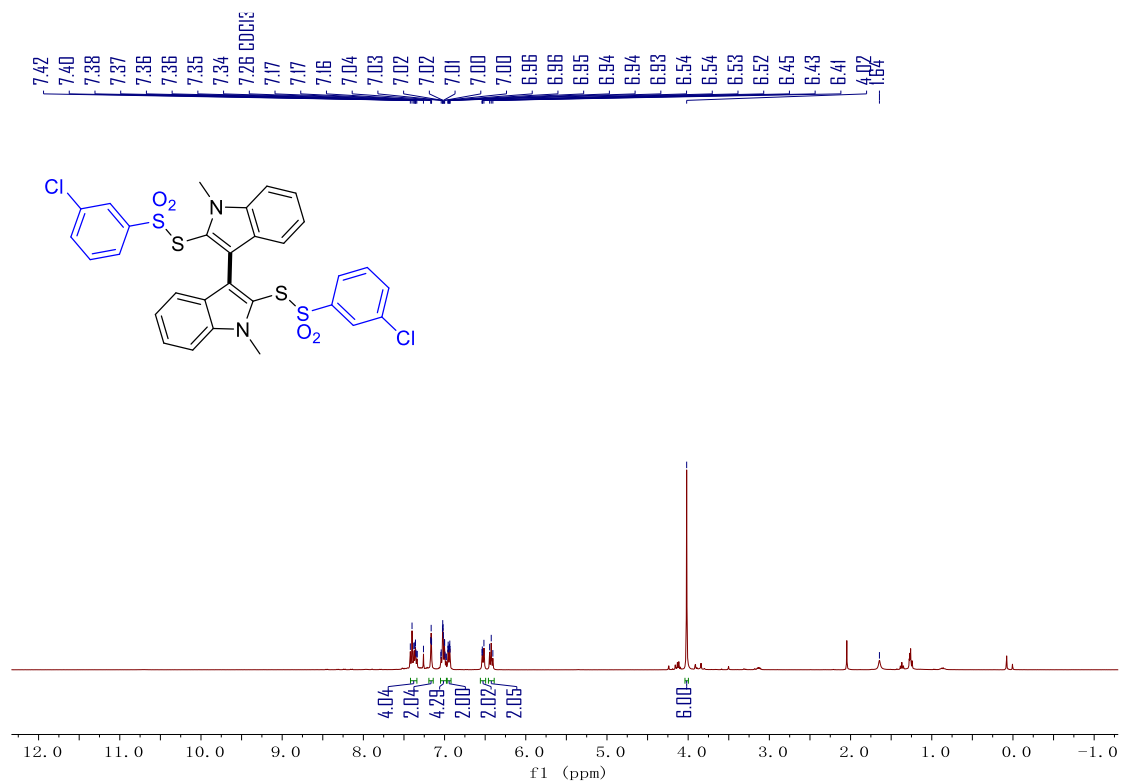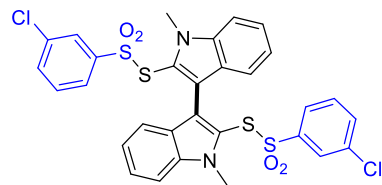

### <sup>13</sup>C NMR spectra of **3j**

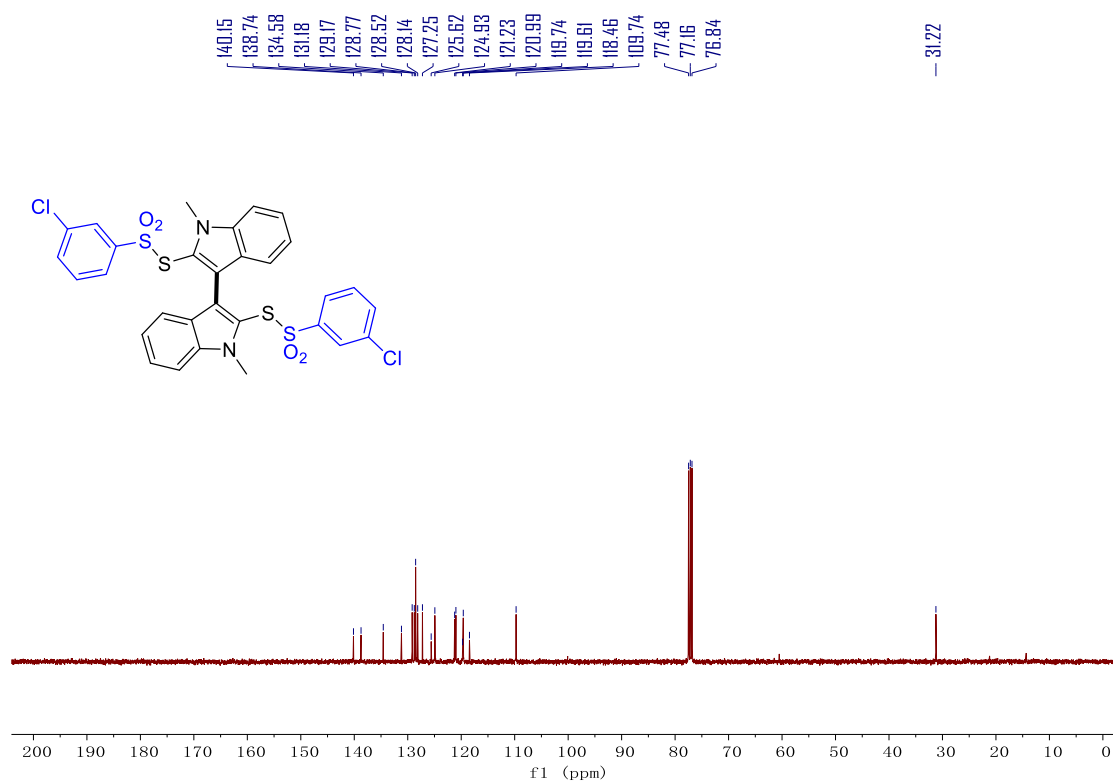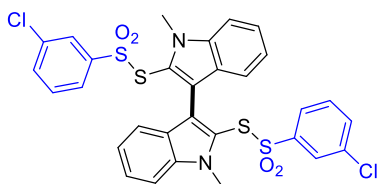

### <sup>1</sup>H NMR spectra of **3k**

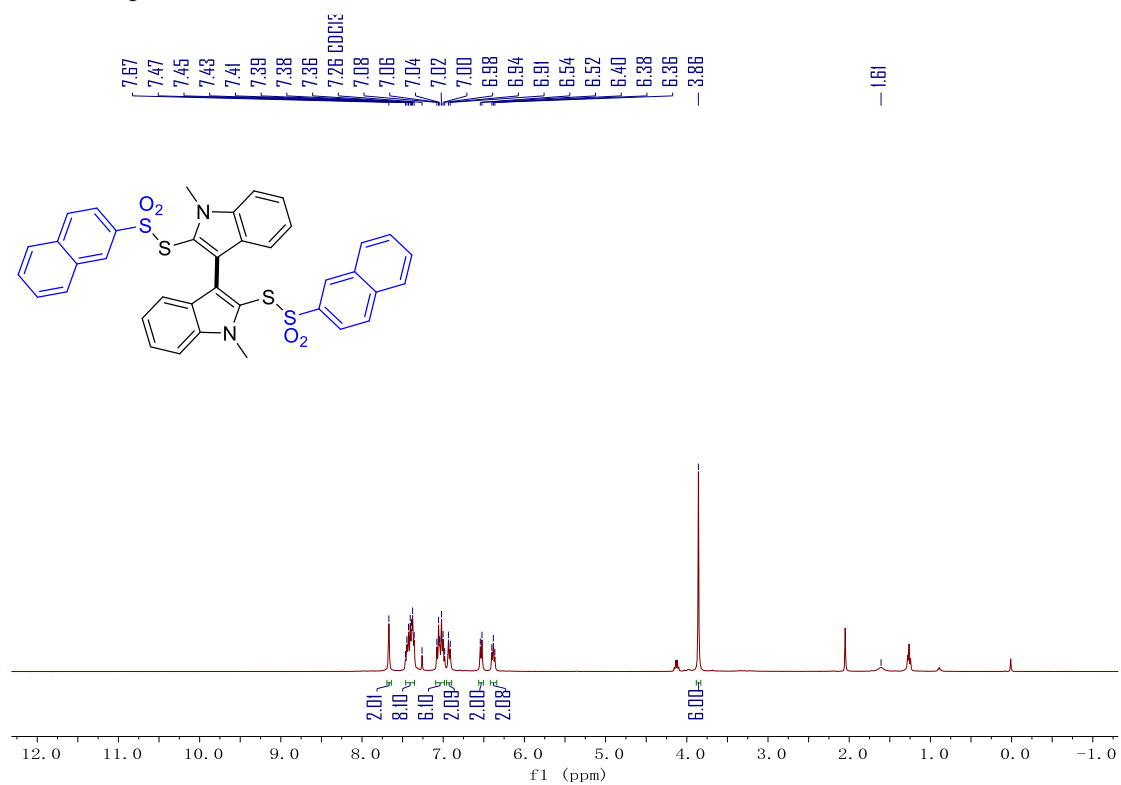

### <sup>13</sup>C NMR spectra of **3k**

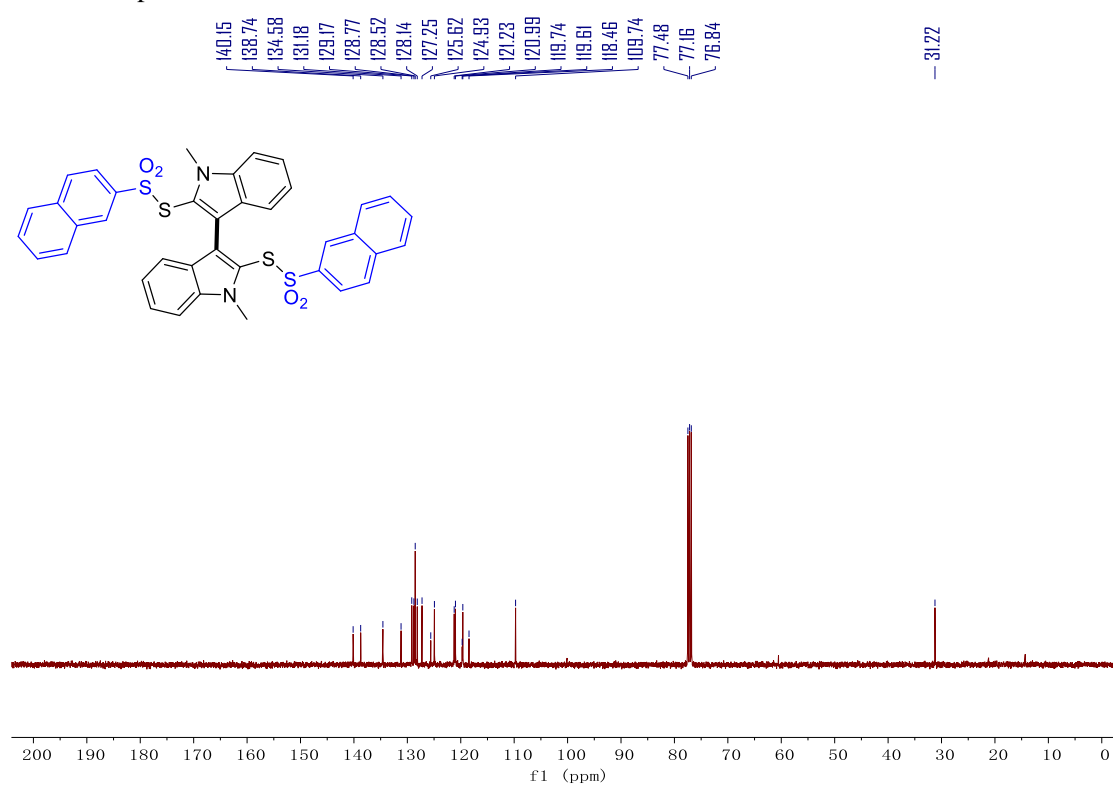

### <sup>1</sup>H NMR spectra of **31**

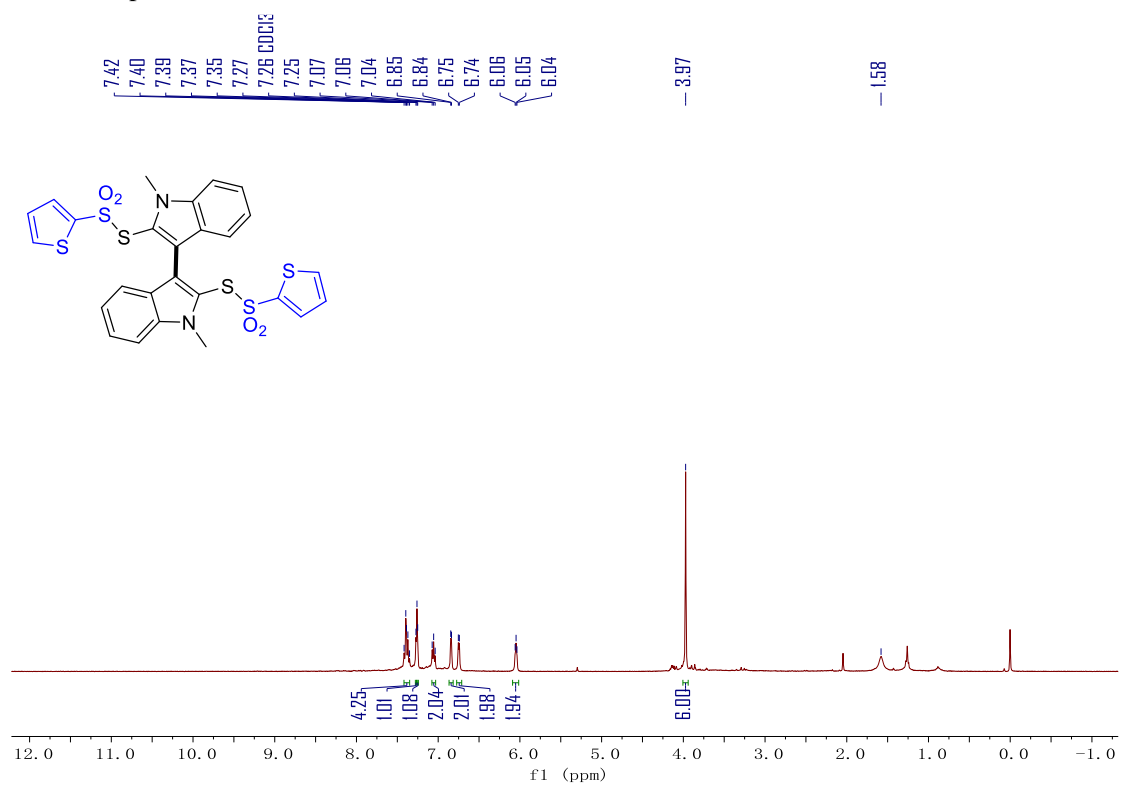

### <sup>13</sup>C NMR spectra of **31**

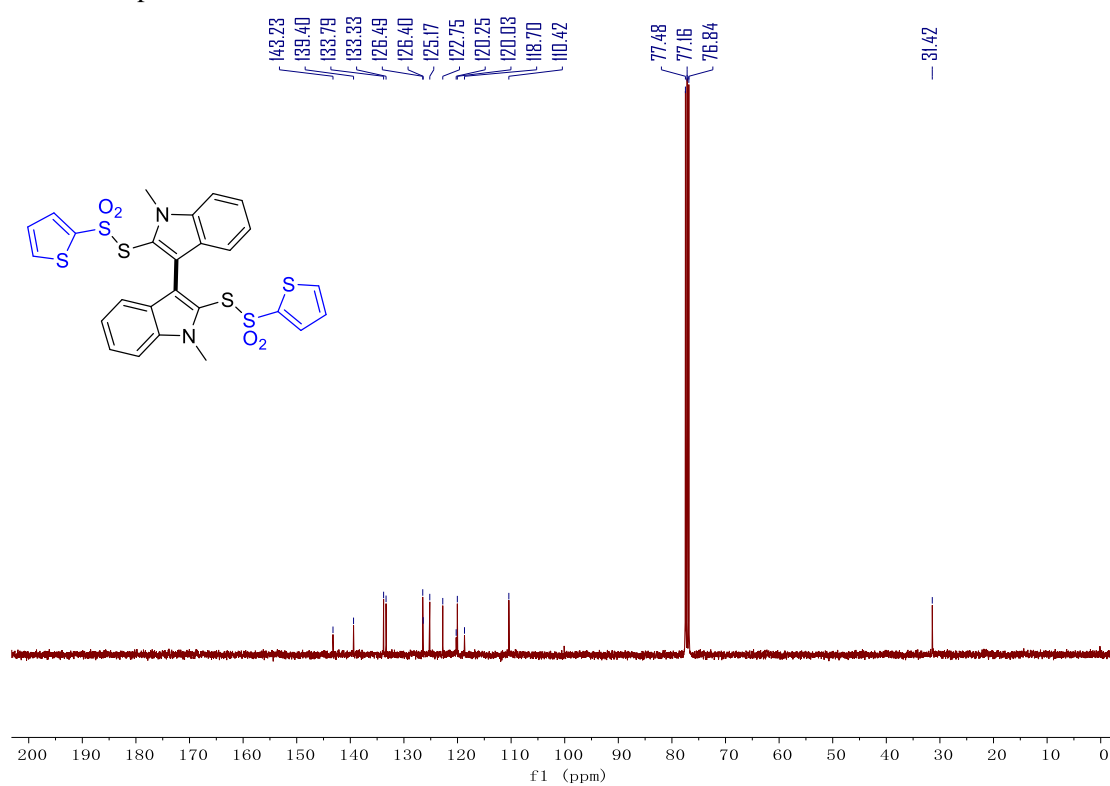

### <sup>1</sup>H NMR spectra of **3m**

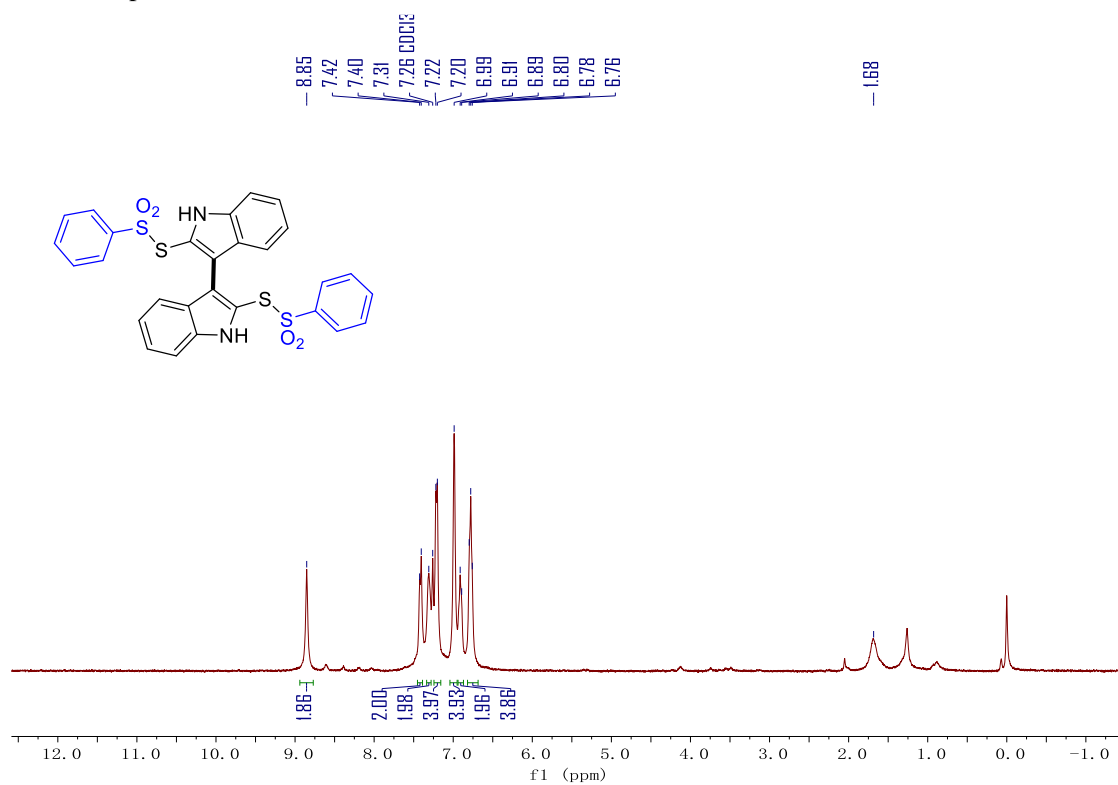

### <sup>13</sup>C NMR spectra of **3m**

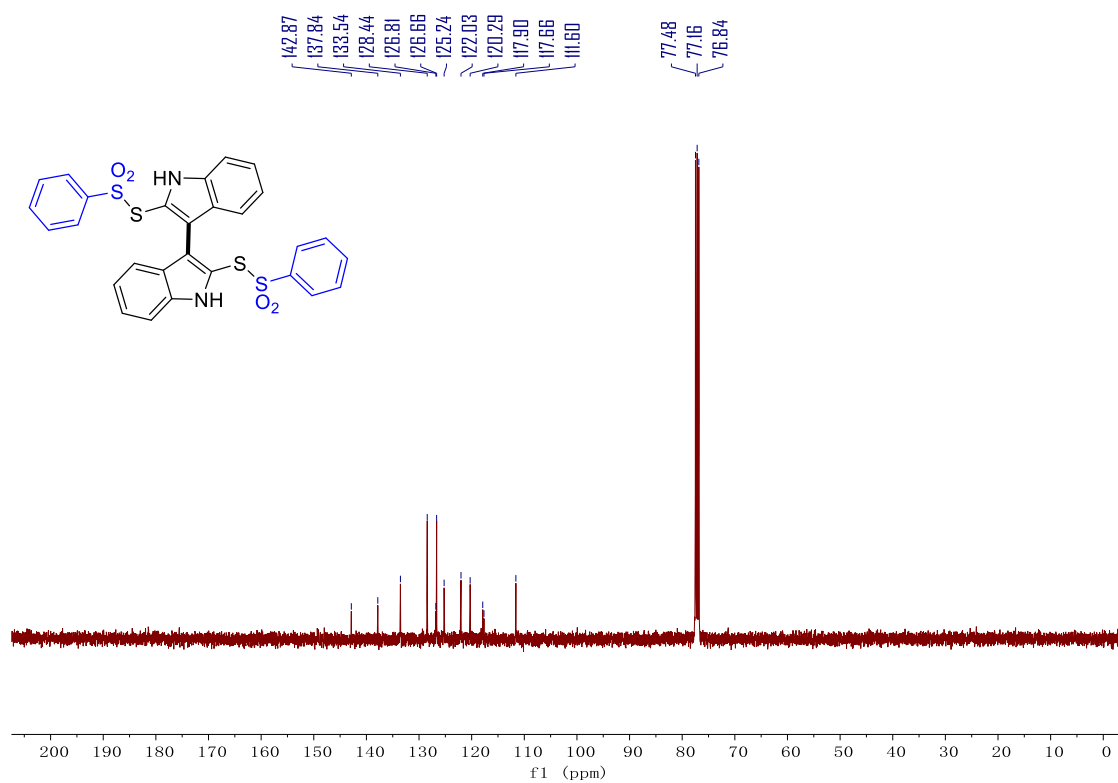



### <sup>1</sup>H NMR spectra of **3n**

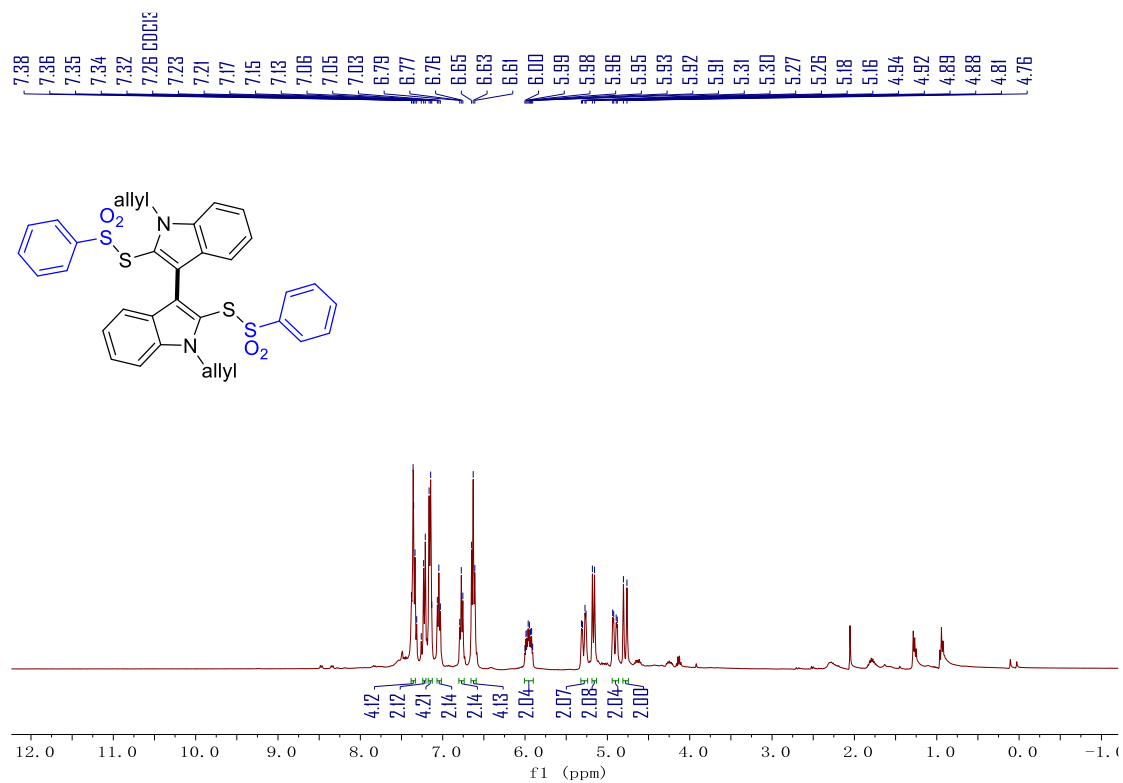

### <sup>13</sup>C NMR spectra of **3n**

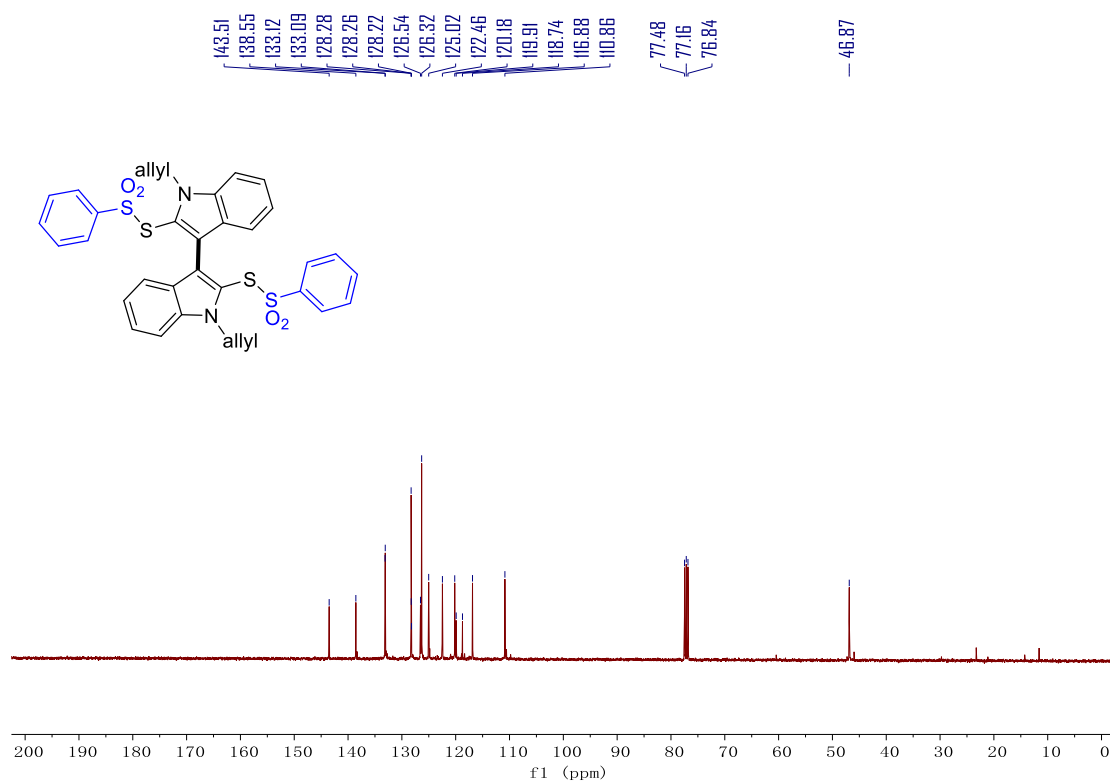

### <sup>1</sup>H NMR spectra of **3o**

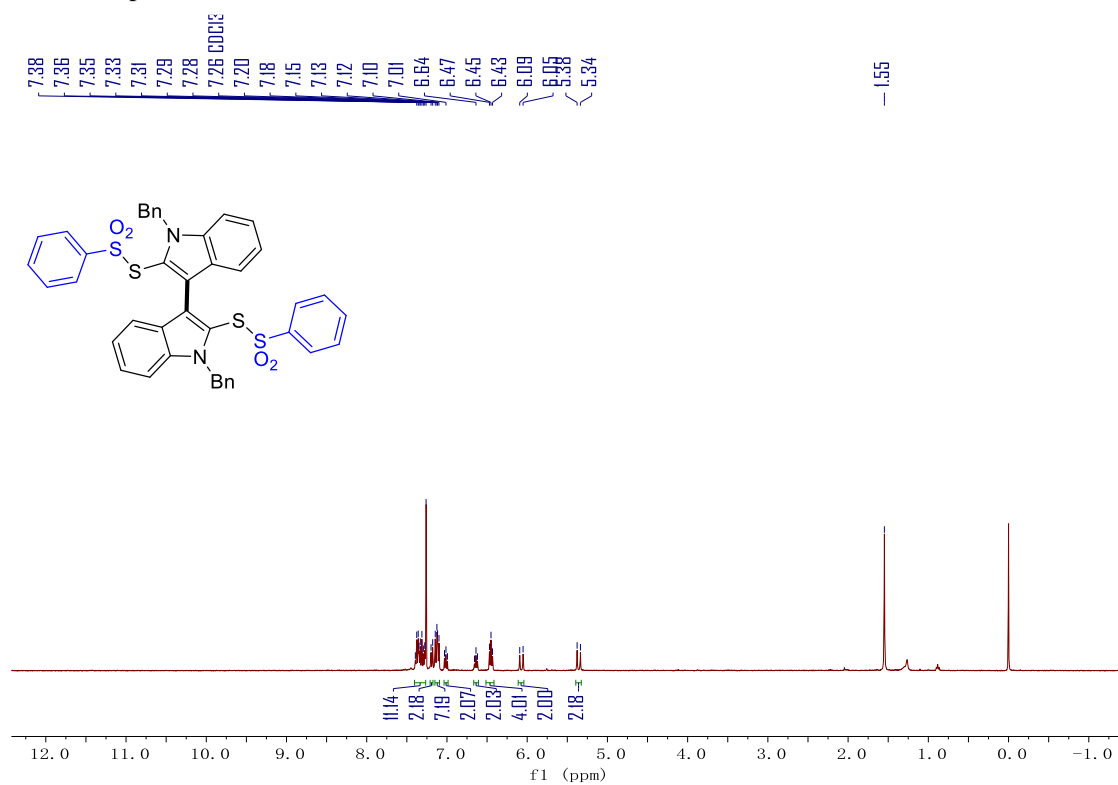

### <sup>13</sup>C NMR spectra of **3o**

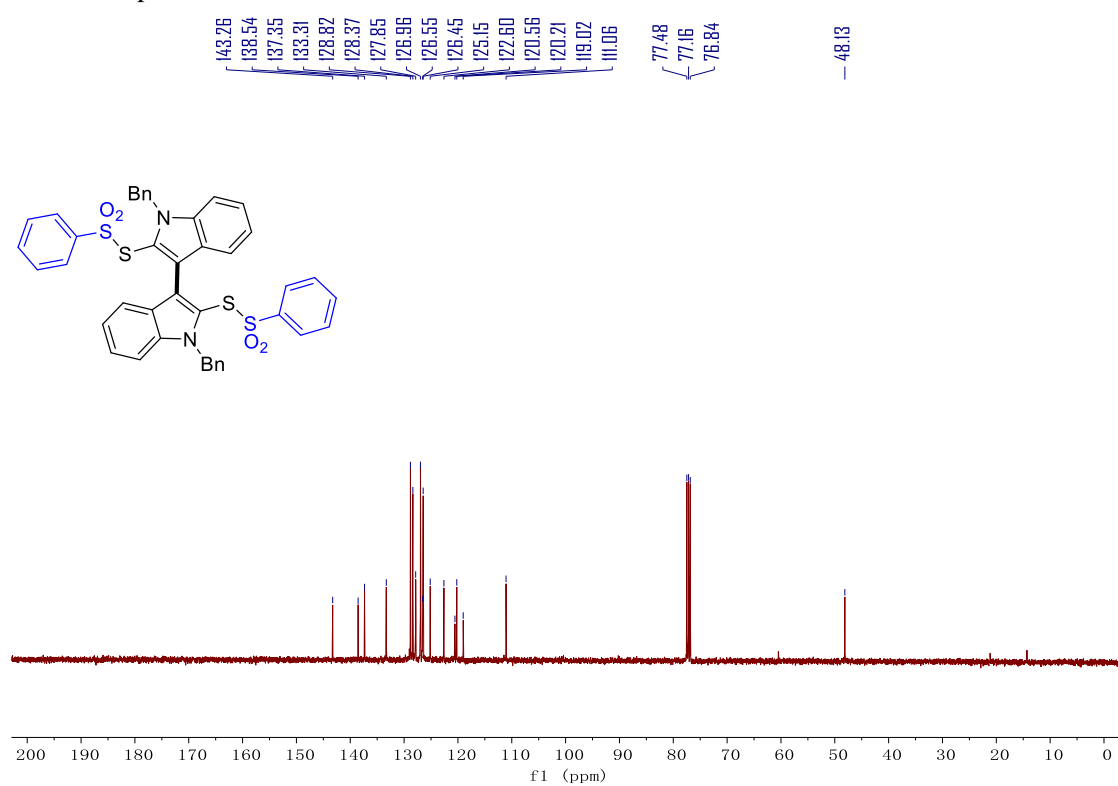

### <sup>1</sup>H NMR spectra of **3p**

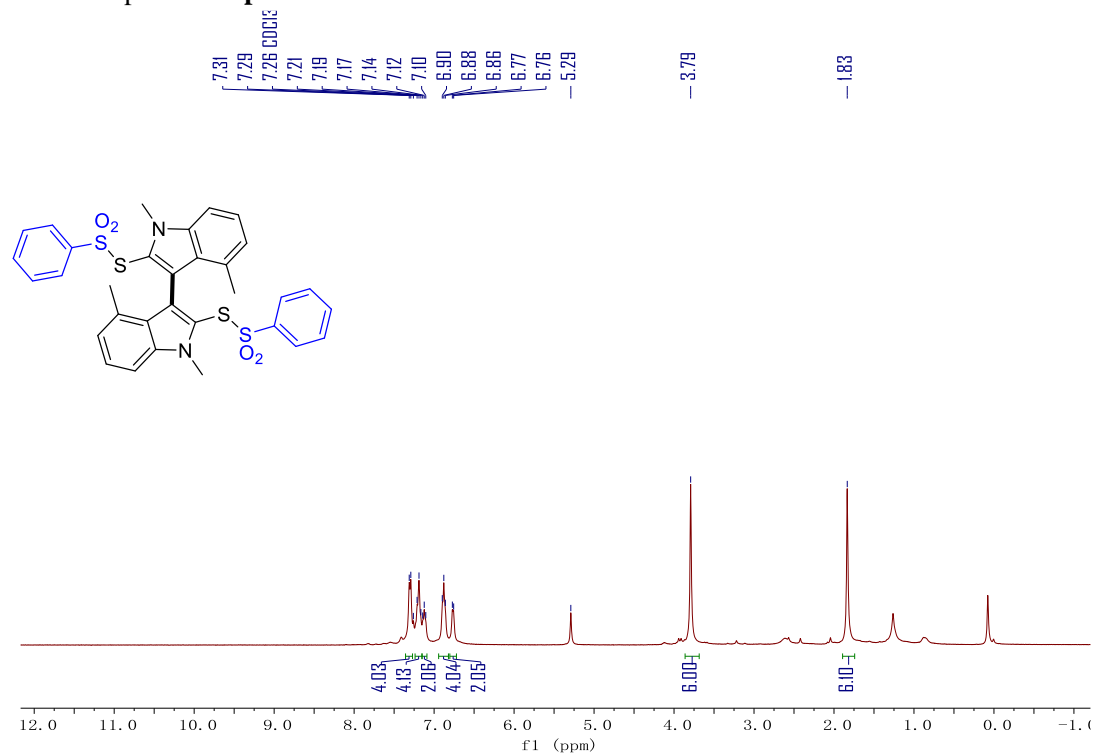

### <sup>13</sup>C NMR spectra of **3p**

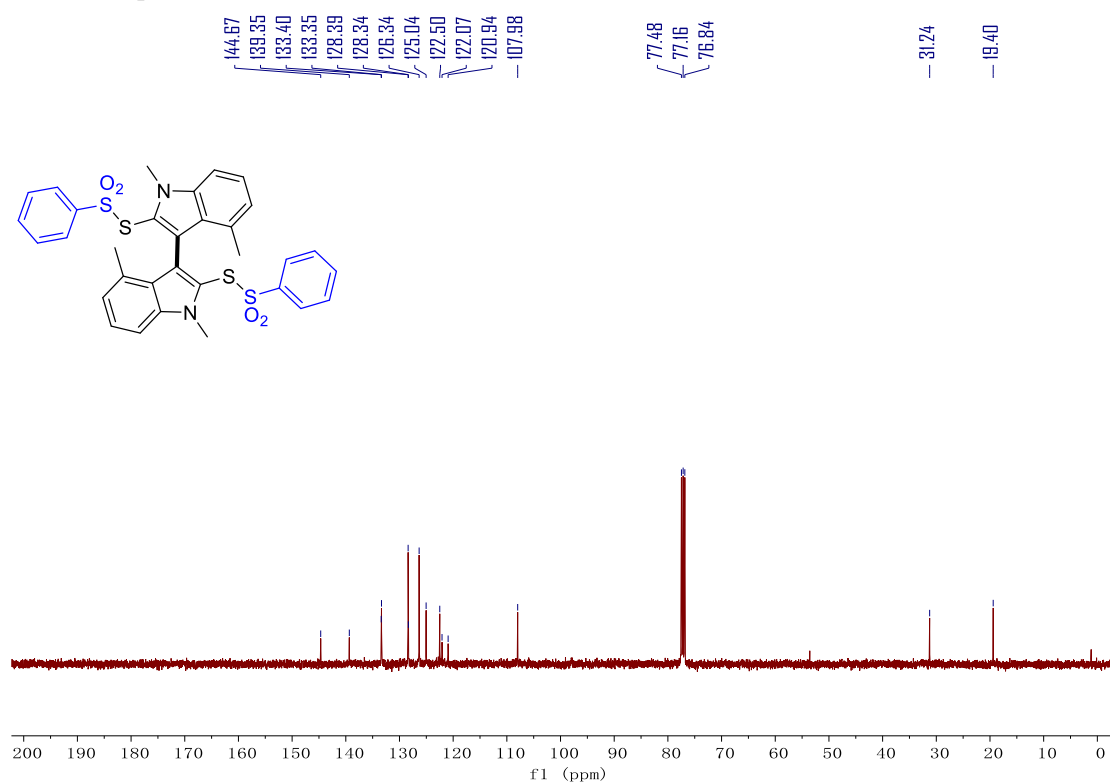

### <sup>1</sup>H NMR spectra of **3q**

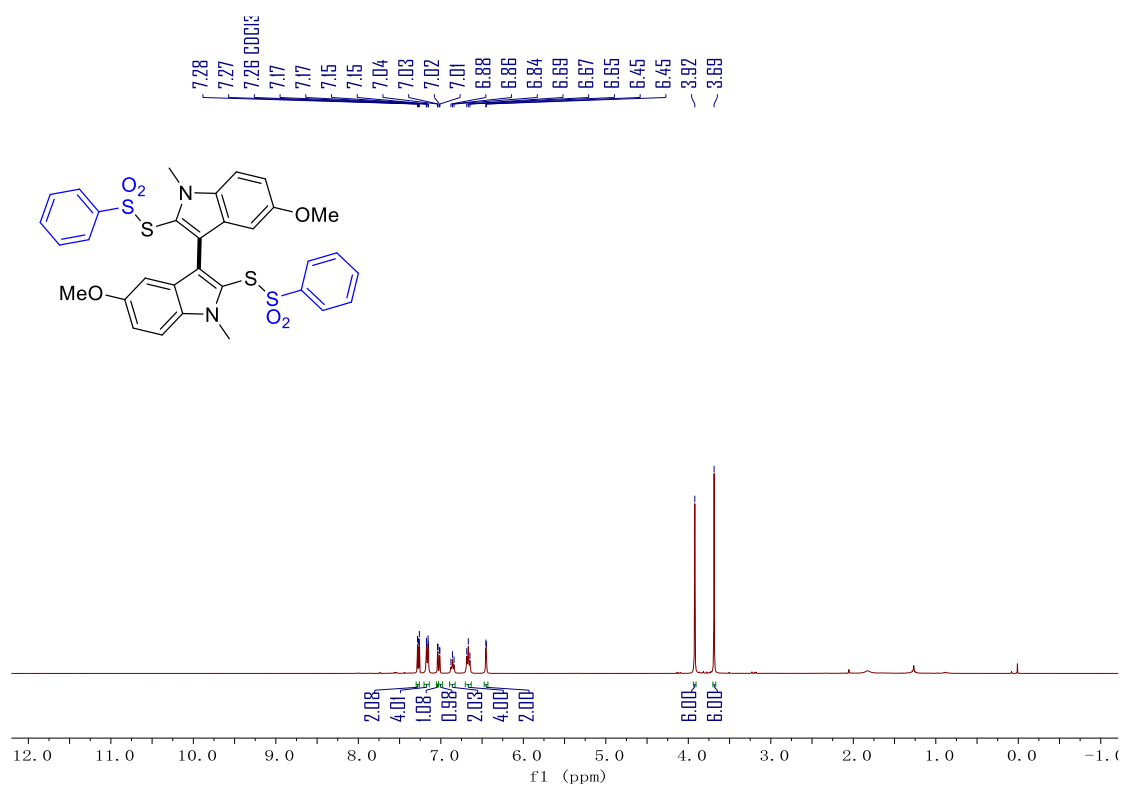

### <sup>13</sup>C NMR spectra of **3q**

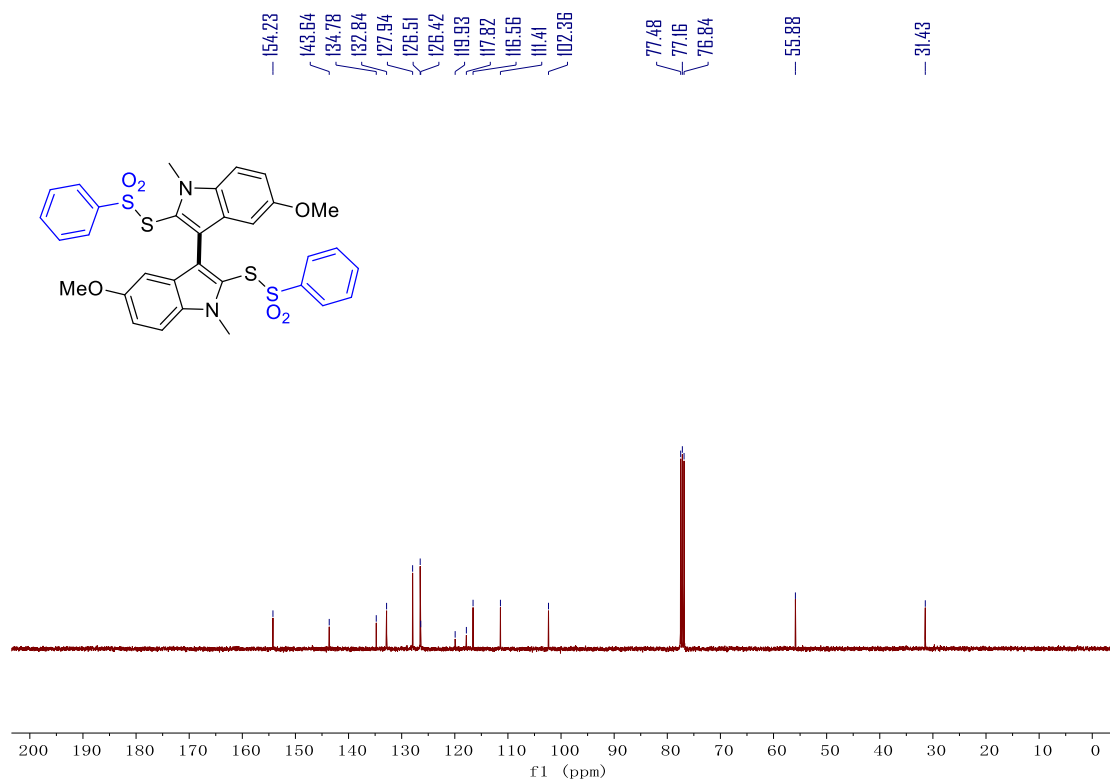

### <sup>1</sup>H NMR spectra of **3r**

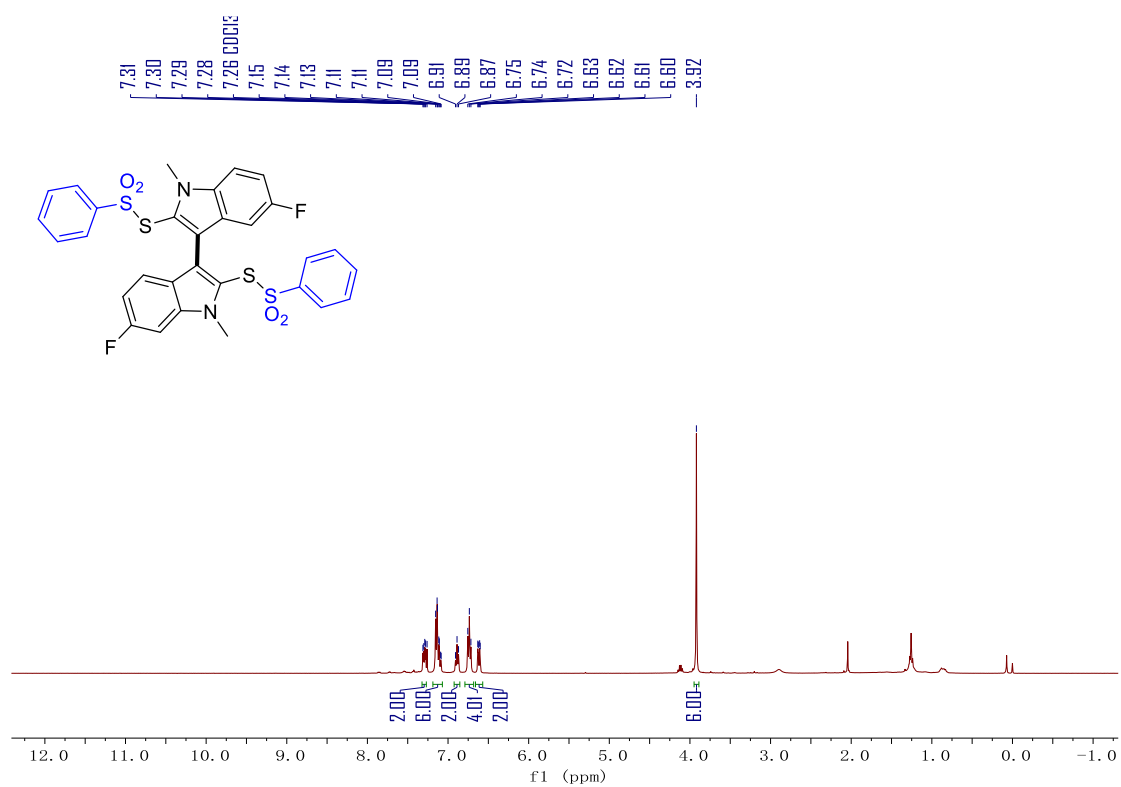

### <sup>13</sup>C NMR spectra of **3r**

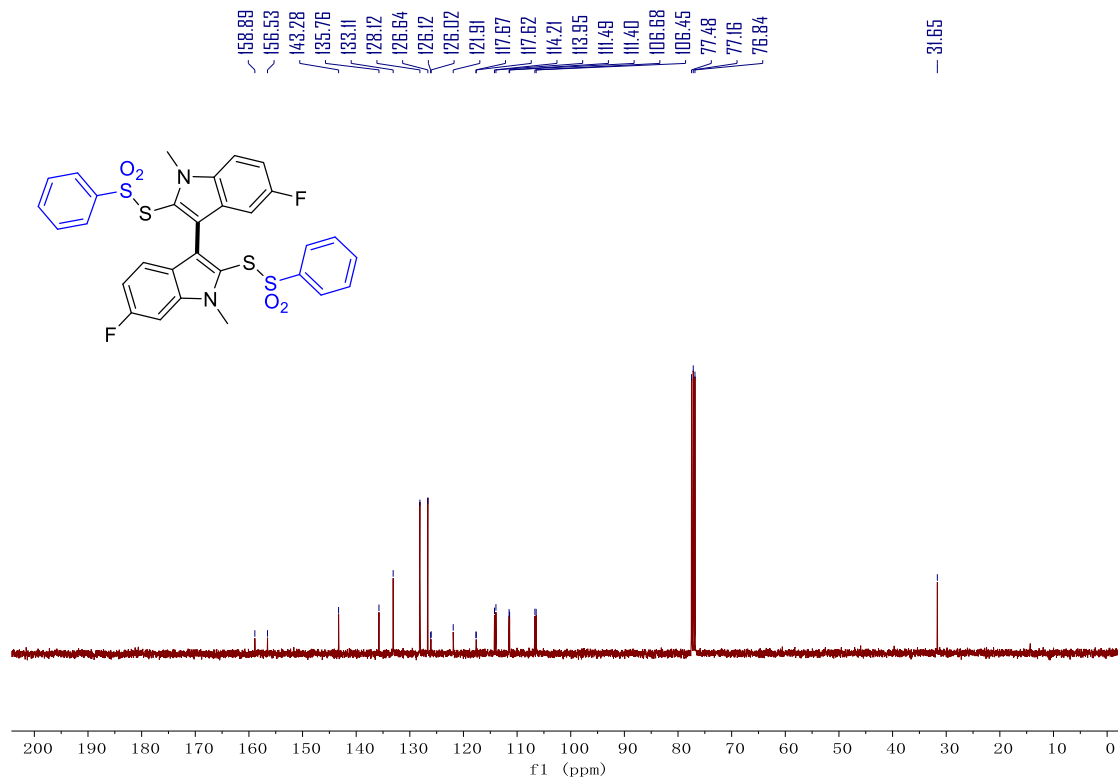

### <sup>1</sup>H NMR spectra of **3s**

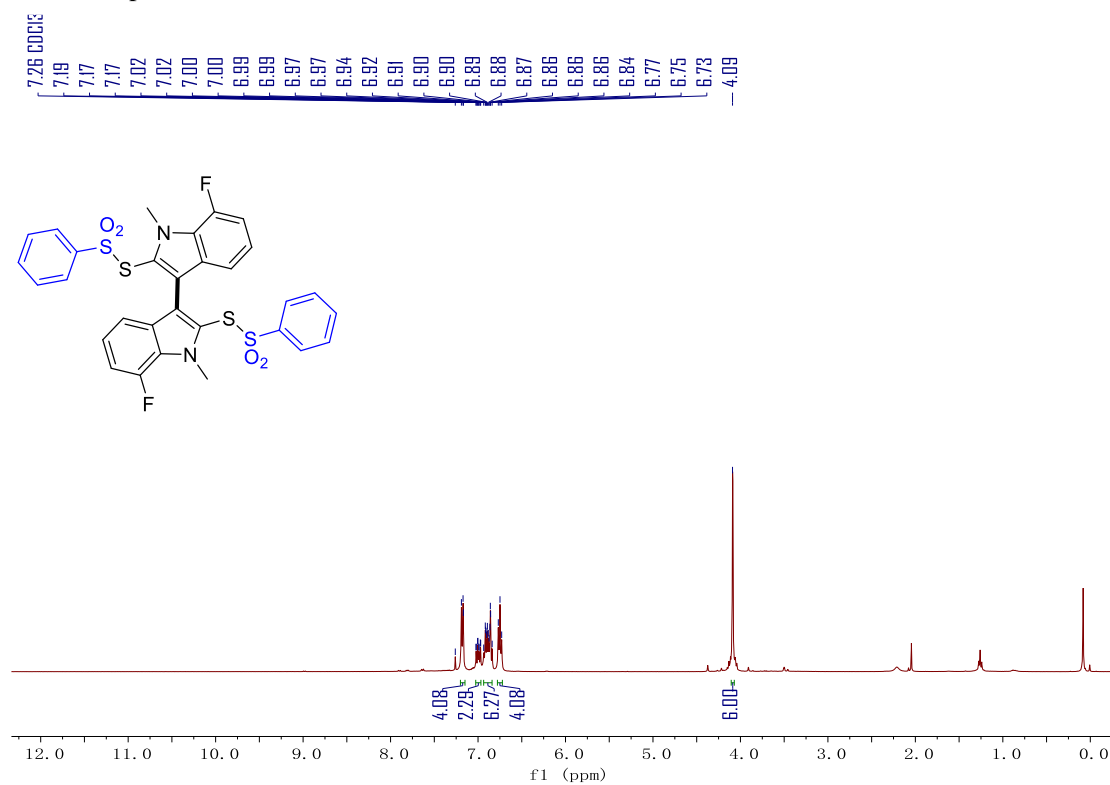

### <sup>13</sup>C NMR spectra of **3s**

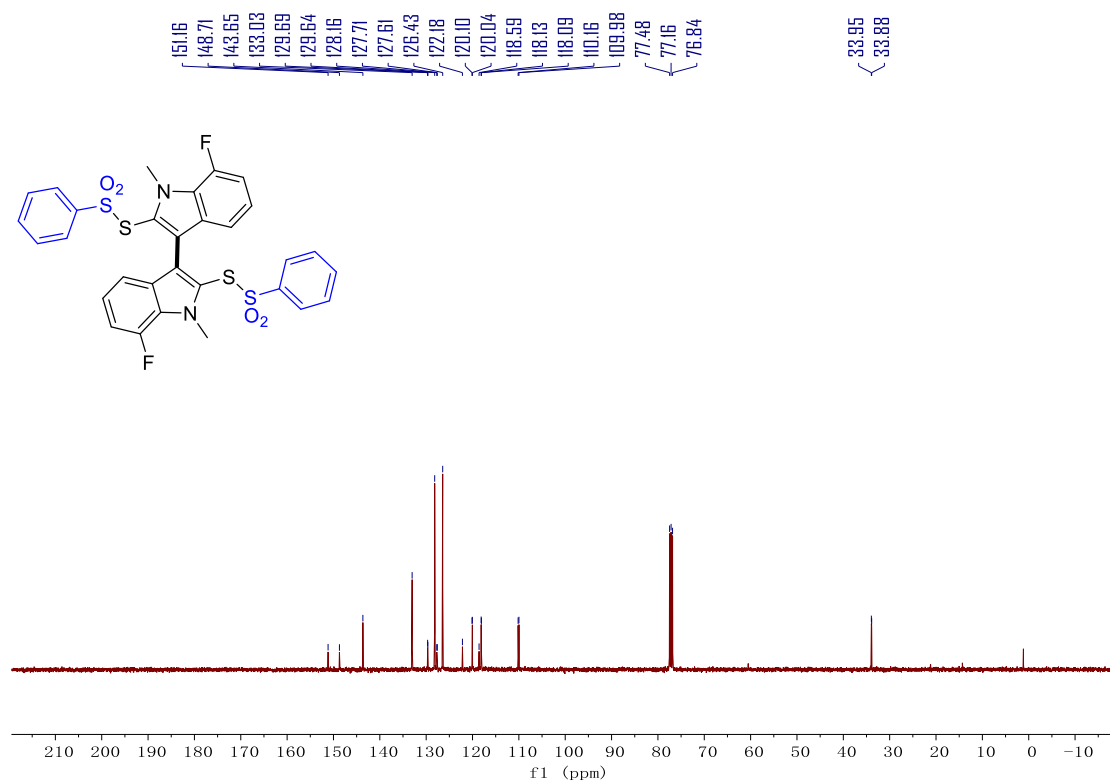

### <sup>1</sup>H NMR spectra of **3t**

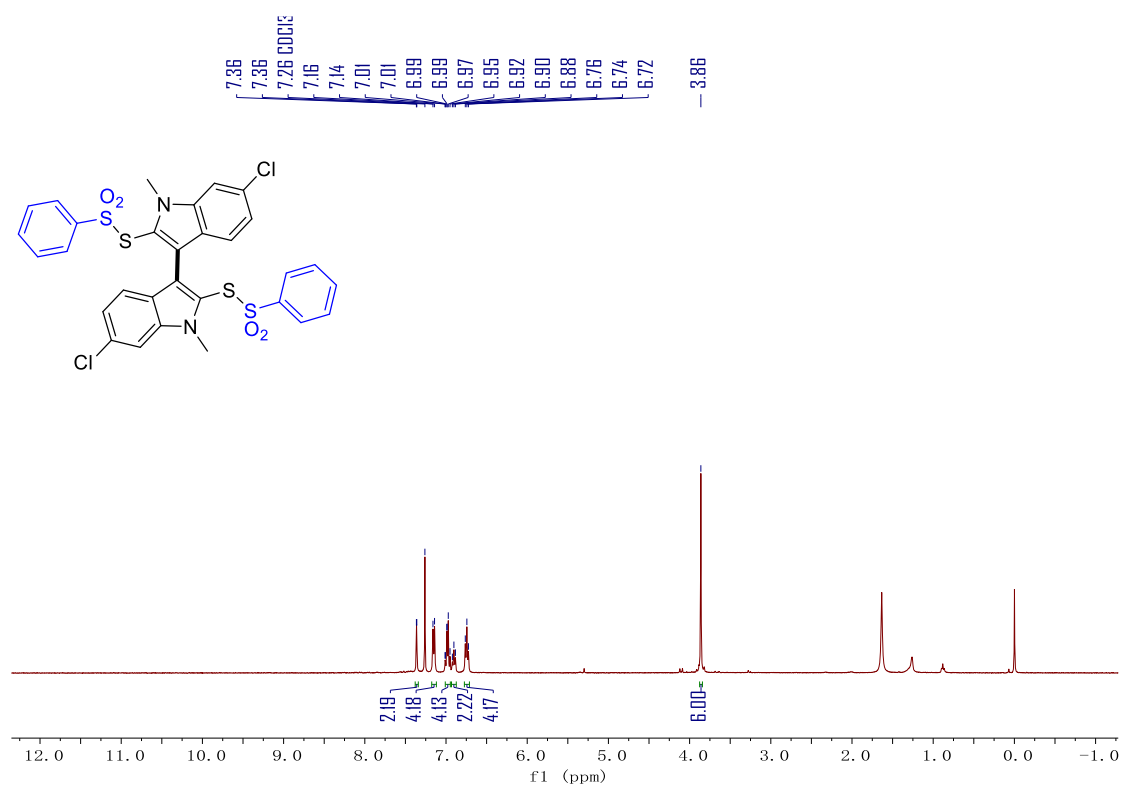

### <sup>13</sup>C NMR spectra of **3t**

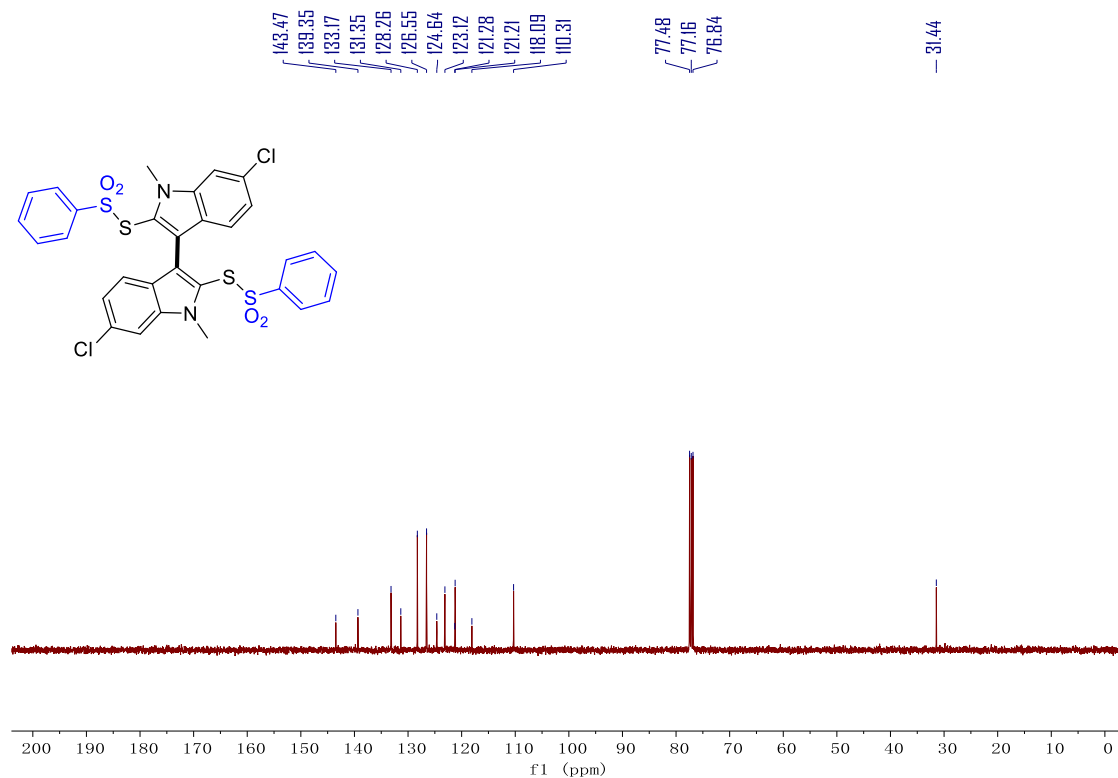

### <sup>1</sup>H NMR spectra of **3u**

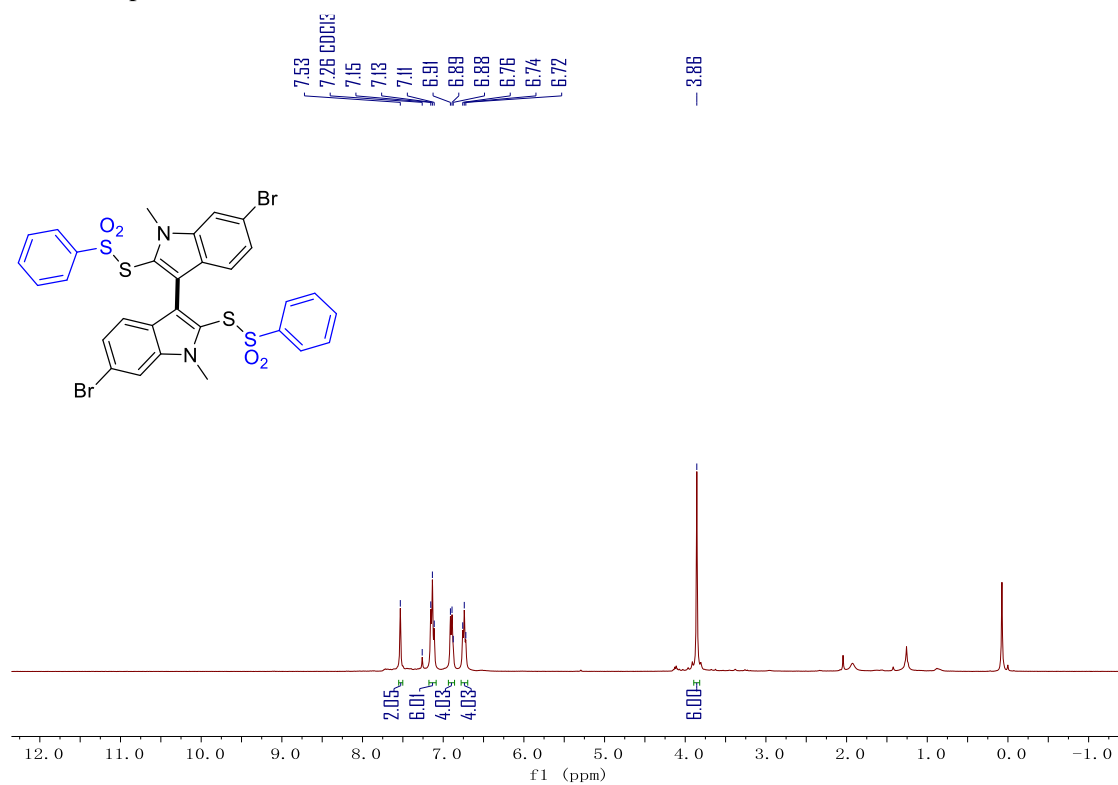

### <sup>13</sup>C NMR spectra of **3u**

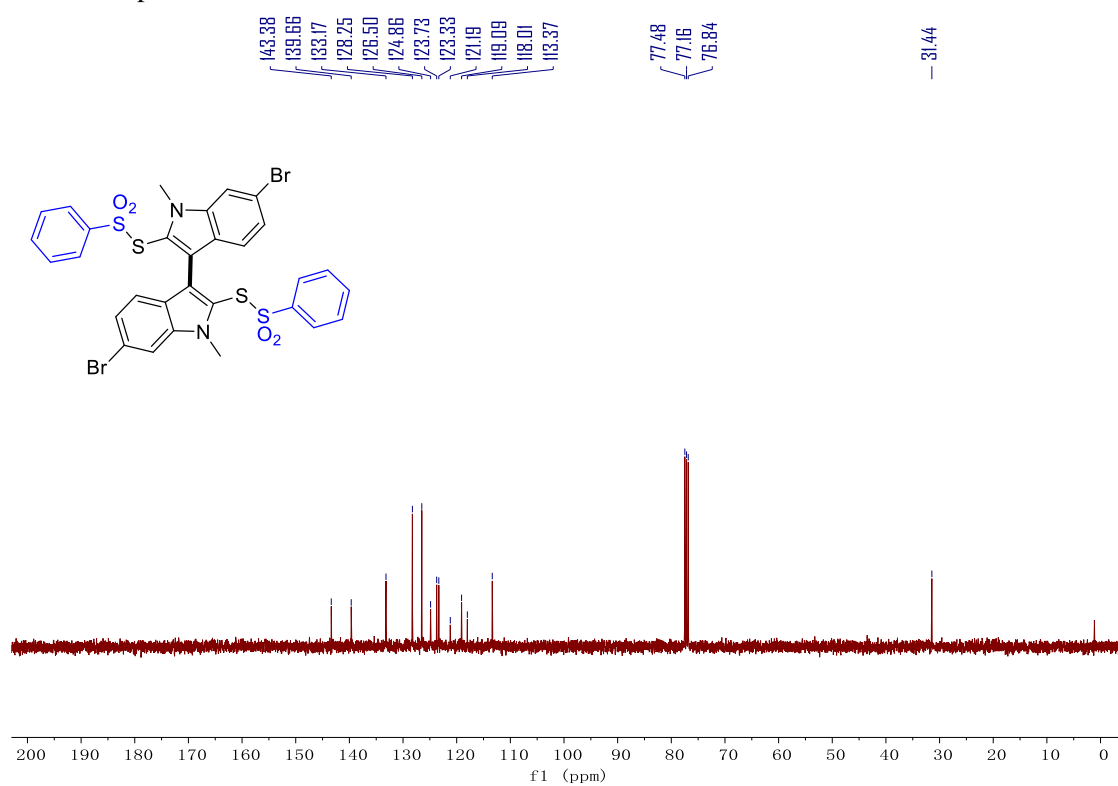

Supplement: d1qo00972a1.pdf [file d1qo00972a1.pdf]
